1

1 **Title**

2 Case fatality rate in COVID-19: a systematic review and meta-analysis

3

4 **Authors**

5 Chanaka Kahathuduwa (MBBS, PhD)<sup>1,2,3</sup>, Chaturika Dhanasekara (MBBS, PhD)<sup>4</sup>, Shao-Hua

6 Chin (PhD)<sup>5</sup>

7

8 **Affiliations**

9 <sup>1</sup> Department of Laboratory Science and Primary Care, Texas Tech University Health Sciences  
10 Center, Lubbock, Texas, USA.

11 <sup>2</sup> Department of Psychiatry, Texas Tech University Health Sciences Center, Lubbock, Texas,  
12 USA.

13 <sup>3</sup> Department of Physiology, University of Peradeniya, Peradeniya, Sri Lanka.

14 <sup>4</sup> Department of Surgery, Texas Tech University Health Sciences Center, Lubbock, Texas, USA.

15 <sup>5</sup> Department of Medical Science, Protech Pharmservices Corporation, Taipei City, Taiwan.

16

17 **Correspondence to:**

18 Dr. Chanaka N. Kahathuduwa, Department of Laboratory Science and Primary Care, Texas Tech  
19 University Health Sciences Center, 3601 4th Street, Lubbock TX 79430

20 Email: [chanaka.kahathuduwa@ttuhsc.edu](mailto:chanaka.kahathuduwa@ttuhsc.edu); Phone: +1- 806-743-2800; Fax: +1-806-743-2784

21

22

23 **Abstract**

24 **Background:** Estimating the prevalence of severe or critical illness and case fatality of COVID-  
25 19 outbreak in December, 2019 remains a challenge due to biases associated with surveillance,  
26 data synthesis and reporting. We aimed to address this limitation in a systematic review and  
27 meta-analysis and to examine the clinical, biochemical and radiological risk factors in a meta-  
28 regression.

29 **Methods:** PRISMA guidelines were followed. PubMed, Scopus and Web of Science were  
30 searched using pre-specified keywords on March 07, 2020. Peer-reviewed empirical studies  
31 examining rates of severe illness, critical illness and case fatality among COVID-19 patients  
32 were examined. Numerators and denominators to compute the prevalence rates and risk factors  
33 were extracted. Random-effects meta-analyses were performed. Results were corrected for  
34 publication bias. Meta-regression analyses examined the moderator effects of potential risk  
35 factors.

36 **Results:** The meta-analysis included 29 studies representing 2,090 individuals. Pooled rates of  
37 severe illness, critical illness and case fatality among COVID-19 patients were 15%, 5% and  
38 0.8% respectively. Adjusting for potential underreporting and publication bias, increased these  
39 estimates to 26%, 16% and 7.4% respectively. Increasing age and elevated LDH consistently  
40 predicted severe / critical disease and case fatality. Hypertension; fever and dyspnea at  
41 presentation; and elevated CRP predicted increased severity.

42 **Conclusions:** Risk factors that emerged in our analyses predicting severity and case fatality  
43 should inform clinicians to define endophenotypes possessing a greater risk. Estimated case

3

44 fatality rate of 7.4% after correcting for publication bias underscores the importance of strict  
45 adherence to preventive measures, case detection, surveillance and reporting.

46

47 **Key Words**

48 COVID-19; Mortality; Case fatality; Systematic review; Meta-analysis; Meta-regression

49

50 **Word Count of Main Text**

51 2,696

52

53

54

55

56

57

58

59

60

61

62

## 63 **Introduction**

64 A novel corona virus, first identified in Wuhan, China in late 2019, resulted in a  
65 pandemic by the first quarter of 2020, contributed by the prolonged survival of the virus in the  
66 environment and extended length of pre- or post-symptomatic and potential asymptomatic  
67 shedding.<sup>1-4</sup> While the virus is known to cause only a mild illness in a majority, severe illness  
68 characterized by respiratory distress requiring hospital admission is not uncommon.<sup>5</sup>  
69 Furthermore, the virus has the potential to precipitate a life-threatening critical illness,  
70 characterized by respiratory failure, circulatory shock, sepsis or other organ failure, requiring  
71 intensive care.<sup>6,7</sup>

72 An extensive body of literature that emerged since the outset of the epidemic in China,  
73 have examined the rates of severe and critically severe illness as well as case fatality associated  
74 with COVID-19. However, the literature on COVID-19 has several limitations. First, due to lack  
75 of awareness and limited availability of training and resources to confirm the diagnosis, failure to  
76 recognize and code COVID-19 as the potential cause of morbidity and mortality may have  
77 contribute to under estimation of the effects of COVID-19.<sup>8</sup> In fact, a recent estimate suggested  
78 that approximately 86% cases of COVID-19 were not documented prior to January 23, 2020.<sup>4</sup>  
79 On the contrary, screening of only those who are at high risk may lead to over-reporting of  
80 morbidity and mortality. Second, given that most datasets and publications are derived from  
81 retrospective chart review, as opposed to prospective methods, high measurement error is  
82 inevitable.<sup>9</sup> Third, the literature on the outcomes are originating mainly from tertiary care  
83 settings, distorting the overall clinical picture.<sup>10</sup> Finally, including the same patients in multiple  
84 reports examining the same research question without clearly indicating is a major lapse in  
85 methodological and ethical standards.<sup>11</sup>

86 As such, we aimed to conduct a systematic review of the available literature to identify  
87 publications with minimal potential overlap, in order to estimate the prevalence of severe illness,  
88 critical illness and case fatality among individuals with COVID-19 in random-effects meta-  
89 analyses to enhance generalizability. More importantly, we aimed to adjust our prevalence  
90 estimates by correcting for publication bias and underreporting. We further aimed to examine the  
91 effects of clinical, biochemical and radiological risk factors moderating the between-study  
92 heterogeneity of the severity and case fatality rates.

### 93 **Methods**

#### 94 Search strategy and selection criteria

95 All procedures were conducted in accord with the Preferred Reporting Items for  
96 Systematic Reviews and Meta-analyses (PRISMA) guidelines. PubMed, Scopus and Web of  
97 Science databases were searched on March 7, 2020 with the aim of identifying studies that have  
98 been published in year 2020 examining the prevalence of severe illness, critically severe illness  
99 and mortality associated with COVID-19 infection using pre-determined keyword combinations  
100 (Table S1 in Appendix). No language restrictions were applied. Duplicate records were removed  
101 and titles and abstracts were screened for pre-defined eligibility criteria (Figure 1) by two  
102 independent raters (CD and CK or SC). Records published in Chinese were translated to  
103 American English using Google translator and a native Chinese speaker (SC) examined the  
104 original records in Chinese. Full-text manuscripts of records that were deemed eligible in the  
105 initial screening were re-examined. All eligible full-text manuscripts were examined using the 9-  
106 item Quality Assessment Tool for Case Series Studies of the National Heart, Lung and Blood  
107 Institute by two study personnel.

108 **Figure 1:** PRISMA flow chart outlining eligibility criteria and study selection.

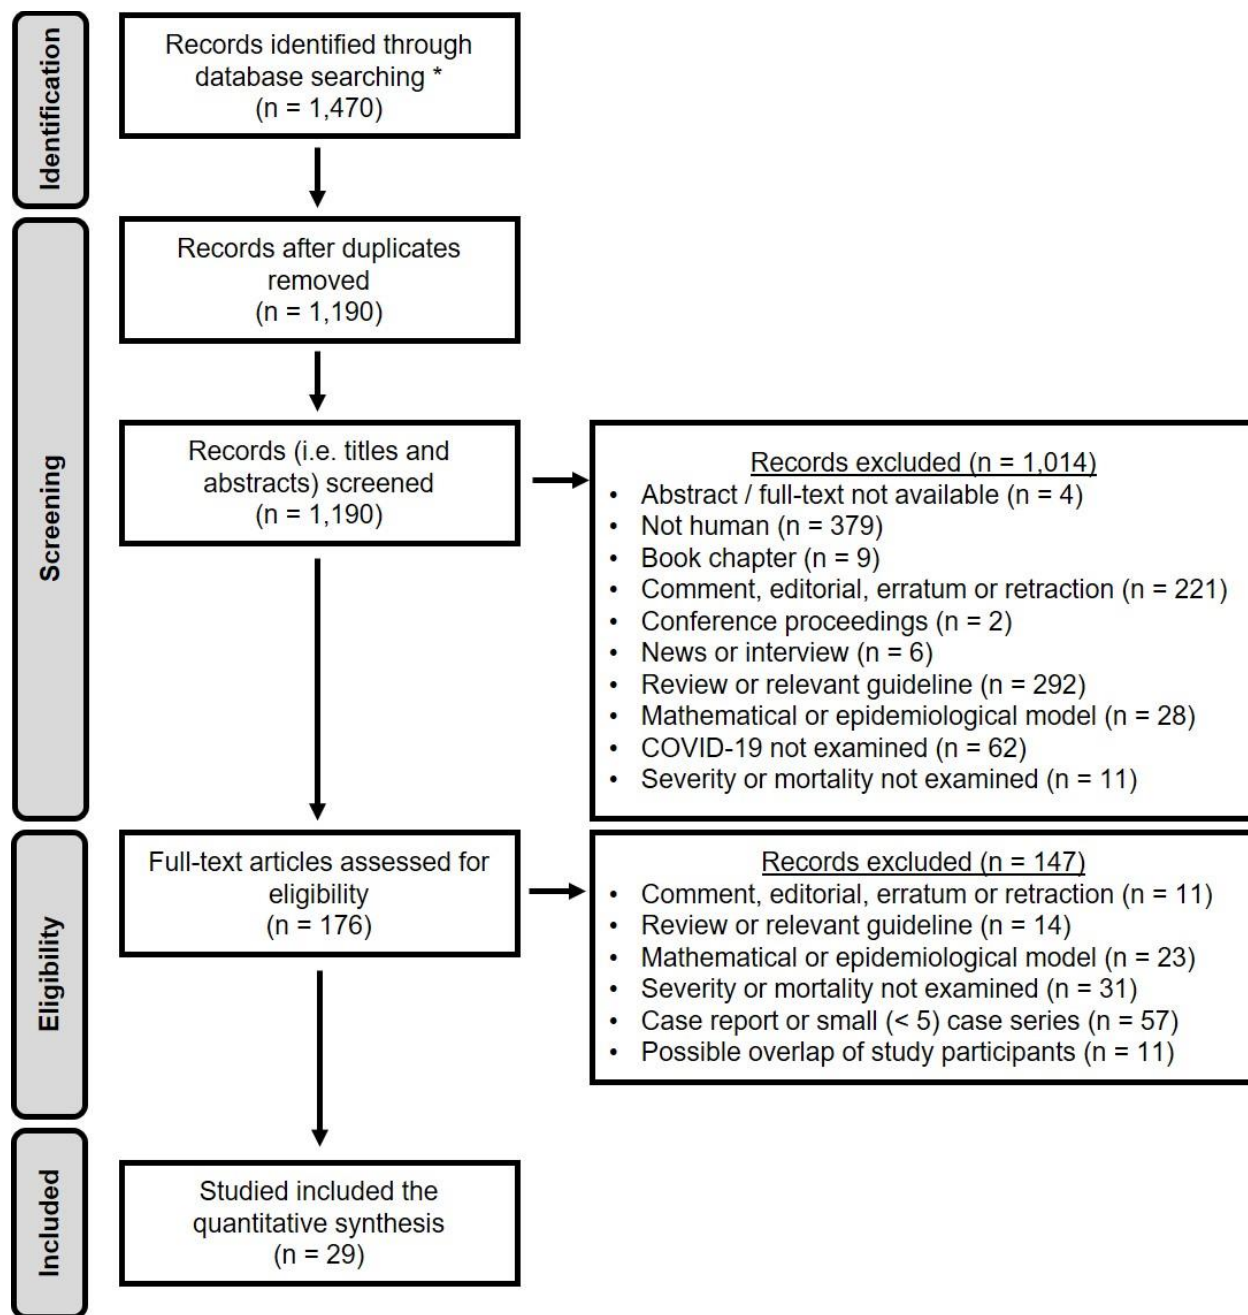

109

110 Data were extracted from the eligible manuscripts into pre-defined data-fields. The data  
111 fields included the total sample size and number of participants with severe illness, critically  
112 severe illness and mortality. Severe illness was operationally defined as having either respiratory  
113 distress with  $RR \geq 30$  /min, resting peripheral oxygen saturation of  $\leq 93\%$  or arterial partial

114 pressure of oxygen  $\leq 300$  mmHg, requiring hospitalization. Critical illness was defined as having  
115 respiratory failure, circulatory shock, end-organ failure or any combination of the above  
116 requiring intensive care. In addition, the following variables were extracted as potential  
117 covariates of the above outcomes. Central tendency (i.e. mean or median) and dispersion (i.e.  
118 SD, SE, 95%CI, IQR or range) of age were extracted. When not reported, study level means and  
119 standard deviations for age were imputed from the available statistics (i.e. median, IQR or  
120 range).<sup>12</sup> Proportions of the following variables within a study sample were extracted: age  $\leq 18$   
121 years, age  $\geq 60$  years, female sex, diabetes mellitus, hypertension, heart disease, chronic liver  
122 disease, chronic kidney disease, chronic obstructive pulmonary disease, malignancy,  
123 immunosuppression (e.g. HIV), smoking and pregnancy. Proportions of patients with specific  
124 presenting symptoms (i.e. fever, cough, sore throat, shortness of breath, headache, diarrhea),  
125 asymptomatic cases, specific laboratory parameters (i.e. positive nucleic acid test for COVID-19,  
126 leukopenia, leukocytosis, thrombocytopenia, lymphopenia, elevated lactate dehydrogenase  
127 (LDH), elevated C-reactive protein (CRP), elevated erythrocyte sedimentation rate (ESR), high  
128 procalcitonin and high D-dimer based on reference ranges considered in each study) and  
129 radiographic features (i.e. no lesions on CT, patchy consolidation, ground glass opacities,  
130 peripheral distribution, and bilateral lung involvement or involvement of  $\geq 3$  lobes).

### 131 Data analysis

132 Three separate DerSimonian-Laird random-effects meta-analyses were performed using  
133 the ‘meta’ package (version 4.11-0) in R statistical software (version 3.6.2) to examine three  
134 primary outcomes: the prevalence of a) combined severe or critical COVID-19 infection, b)  
135 critically severe COVID-19 infection, and c) COVID-19-associated mortality.<sup>13</sup> Studies with both  
136 zero or 100% proportions were not excluded to ensure incorporation of all available data, which

137 is also known to ensure analytic consistency and minimize bias.<sup>14</sup> Consistency of the findings of  
138 the meta-analyses were confirmed by leave-one-out sensitivity analyses.<sup>15</sup> Given that under-  
139 reporting and publication bias could result in biased (i.e. smaller) prevalence estimates,  
140 publication bias was examined using funnel plots and the effect-sizes were imputed for estimated  
141 missing (i.e. unpublished / unreported) studies via the trim-and-fill method.<sup>16, 17</sup> The meta-  
142 analyses were repeated including the effect-size estimates of these potentially missing studies in  
143 order to obtain unbiased estimates of the three primary outcomes. Heterogeneity of effect-sizes  
144 was quantified by calculating the Higgins'  $I^2$  statistic for each meta-analysis.<sup>18, 19</sup> To explain the  
145 heterogeneity of the studies<sup>20</sup>, exploratory univariate random-effects meta-regression analyses  
146 were performed to examine the moderator effects of each of the covariates described above.

## 147 **Results**

148 Results of database search, subsequent screening and eligibility assessment are  
149 summarized in a PRISMA flow diagram (Figure 1). Out of 1,470 records identified in the initial  
150 database search, 29 studies including data of 2,090 patients with COVID-19 were deemed  
151 eligible. The proportions of females in the study samples ranged from 27.59-100.00%. The mean  
152 age of the participants included in the studies ranged from 2-66 years. Four studies recruited  
153 entirely on children and one study exclusively recruited pregnant women. The included studies  
154 and their quality ratings are summarized in Table S2 with their references. The summary  
155 statistics of all covariates are summarized in Table S3 in Appendix.

156 Pooled prevalence of severe or critically severe illness among individuals with COVID-  
157 19 infection was estimated to be 14.6% (95%CI, 8.9%-23.1%) in the random-effects meta-  
158 analysis (Figure 2a). Excluding any single study from the meta-analysis (i.e. leave-one-out  
159 sensitivity analyses) did not significantly change the pooled prevalence estimate. However,



160 funnel plot of the effect-sizes was severely asymmetric, suggesting substantial underreporting or  
161 publication bias (Figure 2b). Seven effect-sizes were imputed to correct for the publication bias.  
162 When the random-effects meta-analysis was performed including these imputed effect-sizes (i.e.  
163 after correcting for publication bias), the prevalence of severe or critical illness increased to  
164 25.8% (95% CI, 17.2%-36.8%) (Figure 2c).

165         Significant heterogeneity was observed among the prevalence estimates of severe illness  
166 ( $\tau^2 = 1.679$ ;  $I^2 = 94\%$ ,  $p < 0.001$ ). Correcting for publication bias decreased this heterogeneity ( $I^2$   
167  $= 85\%$ , 95% CI, 80%-89%), however, heterogeneity remained significant ( $p < 0.001$ ).  
168 Exploratory univariate random-effects meta-regression analyses conducted with the aim of  
169 explaining the heterogeneity using the moderator effects of the considered covariates suggested  
170 that each of increasing mean age ( $p = 0.006$ ) and prevalence of age  $\geq 60$  years ( $p < 0.001$ ),  
171 hypertension ( $p < 0.001$ ), chronic kidney disease ( $p = 0.038$ ), malignancy ( $p = 0.023$ ) and  
172 chronic obstructive pulmonary disease ( $p = 0.025$ ) were associated with a greater risk of severe  
173 or critical illness associated with COVID-19, while the prevalence of age  $\leq 18$  years ( $p = 0.007$ )  
174 within a sample was associated with a reduced risk of severe or critical illness. Prevalence of the  
175 presenting clinical features of fever ( $p < 0.001$ ), dyspnea ( $p = 0.028$ ) and diarrhea ( $p = 0.026$ );  
176 laboratory findings of lymphocytopenia ( $p = 0.003$ ), elevated LDH ( $p < 0.001$ ), CRP ( $p < 0.001$ )  
177 and D-dimer levels ( $p < 0.001$ ); and bilateral lung involvement or involvement of  $\geq 3$  lung lobes  
178 ( $p = 0.006$ ) was associated with increased risk of severe or critically severe illness, while having  
179 no radiological features on chest CT was associated with decreased risk of severe illness ( $p =$   
180  $0.003$ ). The results of all univariate meta-regression analyses examining the moderator effects of  
181 the covariates on the prevalence of severe or critical illness in COVID-19 infection and their  
182 effects on heterogeneity are summarized in Table S4 in Appendix.

183 **Figure 2:** Results of random-effects meta-analysis examining the pooled prevalence of  
 184 combined severe and critical illness among individuals with COVID-19. a) Forest plot; b) Funnel  
 185 plot depicting publication bias and imputed effect-sizes to correct for publication bias; c) Results  
 186 corrected for publication bias.

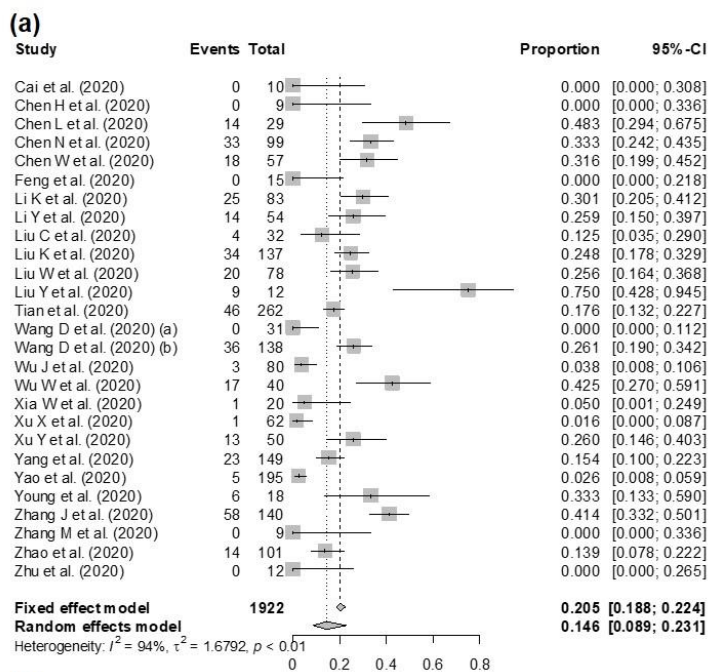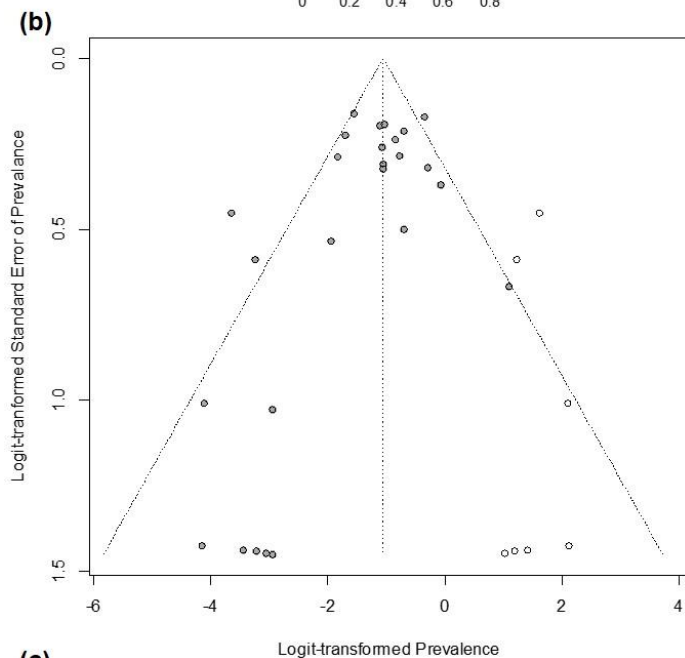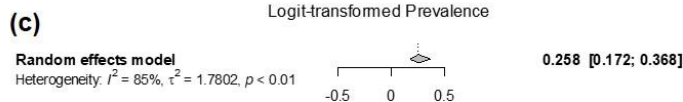

188           The random effects meta-regression analyses revealed a pooled estimate of 4.8%  
189 (95%CI, 2.4%-9.5%) for the prevalence of critical illness in COVID-19 infection (Figure 3a).  
190 Leave-one-out meta-regression analyses did not significantly change this estimate. The funnel  
191 plot of effect-sizes (Figure 3b) was highly suggestive of underreporting or publication bias.  
192 Eleven effect-sizes had to be imputed to statistically correct for this bias and after correction, the  
193 pooled prevalence of critical illness in COVID-19 infection increased to 16.3% (95%CI, 9.8% -  
194 25.7%) (Figure 3c).

195           Significant heterogeneity of effect-sizes was a concern for the meta-analysis of  
196 prevalence of critical illness as well ( $\tau^2 = 1.994$ ;  $I^2 = 92\%$ ,  $p < 0.001$ ). Correcting for publication  
197 bias decreased this heterogeneity ( $I^2 = 78\%$ , 95%CI, 69%-84%), however, heterogeneity  
198 remained significant ( $p < 0.001$ ). Univariate meta-regression analyses suggested increased risk of  
199 critical illness associated with sample characteristics of increasing mean age ( $p = 0.002$ ),  
200 prevalence of age  $\geq 60$  years ( $p < 0.001$ ), comorbid hypertension ( $p < 0.01$ ), cardiac disease ( $p =$   
201  $0.023$ ) and malignancy ( $p = 0.041$ ). Similarly, prevalence of fever ( $p = 0.044$ ), dyspnea ( $p =$   
202  $0.042$ ) and fatigue ( $p = 0.036$ ) on presentation; prevalence of increased LDH ( $p = 0.003$ ), CRP ( $p$   
203  $= 0.008$ ) and D-dimer ( $p = 0.021$ ) were associated with a greater risk of critical illness (Table S5  
204 in Appendix).

205

206

207

208

12

209 **Figure 3:** Results of random-effects meta-analysis examining the pooled prevalence of critical  
 210 illness among individuals with COVID-19. a) Forest plot; b) Funnel plot depicting publication  
 211 bias and imputed effect-sizes to correct for publication bias; c) Results corrected for publication  
 212 bias.

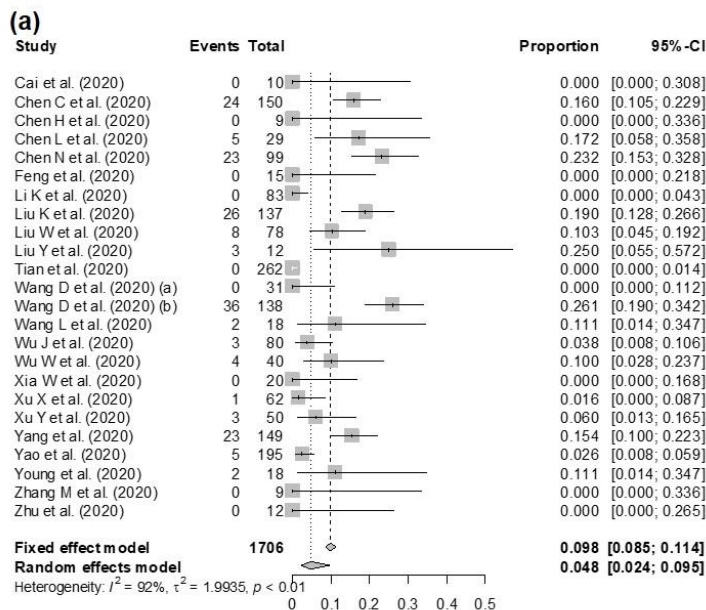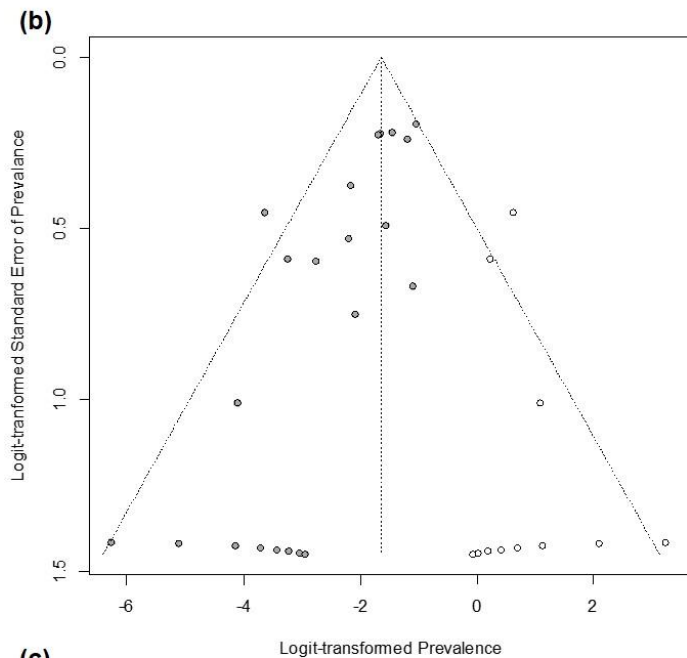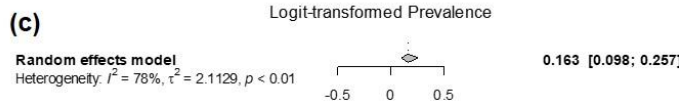

213

214 Prevalence of COVID-19 associated mortality was 0.8% (95% CI, 0.2%-2.9%) based on  
215 the random-effects meta-analysis (Figure 4a) and this estimate was minimally affected by leave-  
216 one-out sensitivity analyses. However, as with severe and critically severe illness, publication  
217 bias / potential underreporting was apparent on the funnel plot of effect sizes (Figure 4b).  
218 Thirteen effect-sizes were imputed to account for missing / unreported effects in an attempt to  
219 statistically correct for the publication bias and conducting the meta-regression analyses with the  
220 addition of these effect-sizes revealed a pooled estimate of 7.4% (95% CI, 4.5%-11.9%) for the  
221 mortality rate associated with COVID-19 infection (Figure 4c).

222 Heterogeneity of effect-sizes on prevalence of mortality in COVID-19 was also a concern  
223 ( $\tau^2 = 2.996$ ;  $I^2 = 86\%$ ,  $p < 0.001$ ). Correction for publication bias decreased the heterogeneity ( $I^2$   
224  $= 61\%$ , 95% CI, 45%-73%), yet the heterogeneity remained significant ( $p < 0.001$ ). Univariate  
225 meta-regression analyses modeling heterogeneity indicated increased mortality risks associated  
226 with increasing mean age ( $p < 0.001$ ), prevalence of age  $\geq 60$  years ( $p = 0.011$ ), presenting with  
227 fatigue ( $p = 0.048$ ), leukocytosis ( $p = 0.007$ ), high LDH ( $p = 0.030$ ) and low albumin ( $p < 0.001$ ).  
228 Prevalence of age  $\leq 18$  years ( $p = 0.036$ ) was associated with a decreased risk of COVID-19-  
229 associated mortality (Table S6 in Appendix).

230

231

232

233

234 **Figure 4:** Results of random-effects meta-analysis examining the pooled case fatality rate among  
 235 individuals with COVID-19. a) Forest plot; b) Funnel plot depicting publication bias and  
 236 imputed effect-sizes to correct for publication bias; c) Results corrected for publication bias.

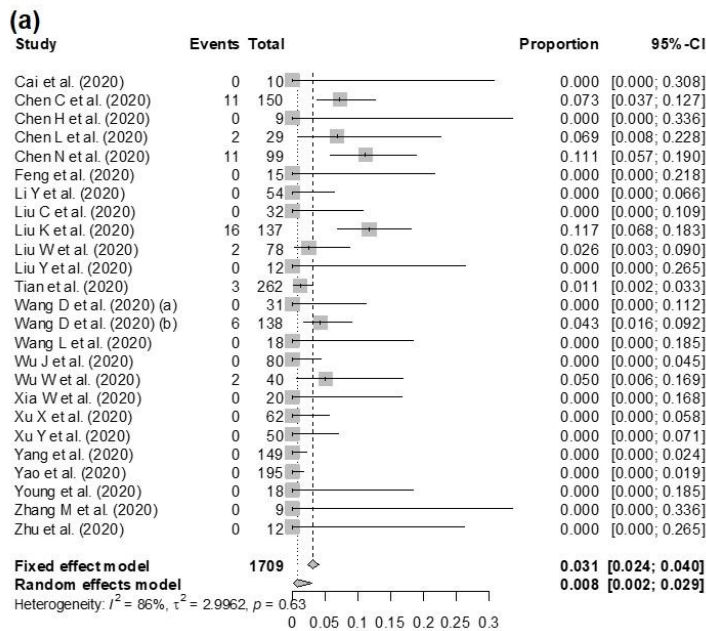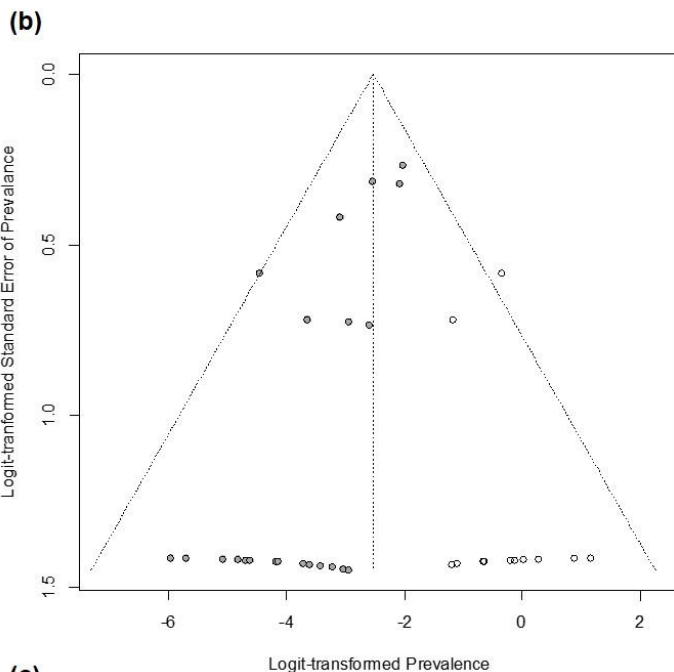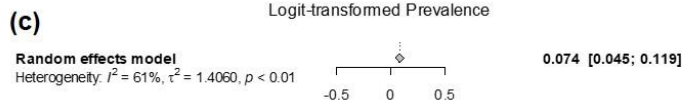

## 238 **Discussion**

239           In this systematic review and meta-analysis, we comprehensively and systematically  
240 examined the available literature to estimate the prevalence of morbidity and mortality associated  
241 with SRAS-CoV-2 infection. Despite the large number of articles that were reviewed, our  
242 quantitative synthesis was limited to 29 studies representing data of 2,090 individuals. Our  
243 literature-based estimates of severe illness, critical illness and case fatality rates among patients  
244 with COVID-19 were 15%, 5% and 0.8% respectively. After adjusting for underreporting and  
245 publication bias, COVID-19-associated prevalence of severe illness, critical illness and case  
246 fatality increased to 26%, 16% and 7.4% respectively.

247           Our unadjusted random-effects estimates of severe illness requiring hospitalization (15%)  
248 and critical illness requiring intensive care admission (5%), are consistent with the estimates of  
249 COVID-19-associated morbidity based on large individual-level datasets.<sup>21</sup>As such, the  
250 unadjusted findings of our meta-analysis regarding severity of illness corroborate the inferences  
251 made based on current surveillance systems. However, the unadjusted mortality rate observed in  
252 our analysis (0.8%, 95% CI, 0.2%-2.9%) is lower than the COVID-19-associated mortality rates  
253 in China (3.6%) or globally (3.4%) at the end of February, 2020 (i.e. the time represented in the  
254 reviewed publications).<sup>22</sup>

255           As we have noted in the introduction, retrospective patient data and the literature derived  
256 from such data could be systematically biased towards both overestimating and / or  
257 underestimating morbidity and mortality. The reviewed studies are largely representing tertiary  
258 care settings, of which the capacity may have been overridden minimally, if at all, despite the  
259 high reproductive number ( $R_0$ ) at the time of sampling. As such, the outcomes of our unadjusted  
260 random-effects meta-analyses, which accounts for the random variability of effects between

261 studies, can be inferred to be a generalizable representation of morbidity and mortality rates  
262 applicable to a well-trained and equipped healthcare setting of which resources are not  
263 overwhelmed. This estimate therefore represents COVID-19 associated mortality in regions with  
264 a low  $R_0$ .

265 However, reverse-causation bias caused by failing to capture the deaths that may not  
266 reach healthcare facilities / be diagnosed prior to death may contribute to underestimation.<sup>23</sup> The  
267 effect-sizes imputed to correct for publication bias may in fact represent severity and case fatality  
268 rates of settings where the demand exceeds the available resources.<sup>24</sup> In fact, our data  
269 substantiate the recent forecasts and recommendations to suppress the epidemic growth.<sup>25</sup> While  
270 optimized utilization of healthcare facilities by maintaining a low  $R_0$  may reduce the mortality  
271 rates to as low as 0.8%, overwhelming healthcare resources may increase the overall case fatality  
272 rate to 7.4%, or even greater as represented by the effect-sizes we have imputed.<sup>26</sup>

273 In our meta-regression analyses that examined risk factors, increasing age and age  $\geq 60$   
274 years consistently stood out as a risk factor, while age  $\leq 18$  years consistently remained a  
275 protective factor, being consistent with the current literature. Angiotensin converting enzyme  
276 (ACE)-2 receptors are generally upregulated in patients with hypertension or heart failure, who  
277 receive ACE-inhibitors and angiotensin-II receptor blockers.<sup>27</sup> COVID-19 is known to enter  
278 cells by binding to ACE-2 receptors, increasing their risk of infection and development of severe  
279 clinical illness.<sup>27</sup> Consistently, we observed an increased risk of severity with hypertension and  
280 cardiovascular disease. Presenting with fever emerged as a risk factor for severe and critical  
281 illness as well as mortality, underscoring the importance body temperature as a screening tool.<sup>28</sup>

282 Our systematic review has some limitations. First, while we eliminated studies with  
283 overlapping samples by screening for overlaps of institutes, study dates and authors, we cannot



284 be 100% certain. Second, high degree of heterogeneity was a concern. However, this should be  
285 expected in any meta-analysis due to the variability in methodology and study samples and we  
286 used heterogeneity to explore covariates in meta-regression analyses.<sup>18,20</sup> Third, funnel plots of  
287 all three meta-analyses indicating substantial publication bias, limiting the generalizability of  
288 uncorrected random-effects meta-analyses. Finally, the protocol was not pre-registered. Use of a  
289 systematic search strategy; use of random-effects meta-analyses and meta-regression analyses  
290 assuming high heterogeneity of effect-sizes; exploring the etiology of heterogeneity in meta-  
291 regression analyses, which also identified risk factors of morbidity and mortality; exploring the  
292 validity of our findings in sensitivity analyses; and statistically correcting for publication /  
293 underreporting bias are notable strengths of our systematic review and meta-analysis.

294 In conclusion, after correcting for publication bias, COVID-19 associated overall rates of  
295 requirement for hospitalization, intensive care and case fatality could be as high as 26%, 16%  
296 and 7.4% respectively. This underscores the importance of strict adherence to preventive  
297 measures, case detection, surveillance and reporting. Hypertension; fever and dyspnea at  
298 presentation; and elevated CRP seem to predict increased disease severity, while increasing age  
299 and elevated LDH seem to consistently predict severity and case fatality. These risk factors  
300 should inform clinicians to define endophenotypes possessing a greater risk.

301

302

303

304

305

306 **Contributors**

307 CK, CD and SC conceptualized the study; CK and CD conducted the literature search; CK, CD  
308 and SC were involved in screening the literature; CK and CD extracted the data; CK performed  
309 the meta-analyses and meta-regression analyses; CK and CD wrote the manuscript; all authors  
310 read and agreed to the content of the manuscript.

311

312 **Declaration of interests**

313 The study was not funded. The authors have no potential conflicts of interest to declare.

314

315

316

317

318

319

320

321

322

323

324

325 **References**

- 326 1 Huang C, Wang Y, Li X, Ren L, Zhao J, Hu Y, *et al.* Clinical features of patients infected  
327 with 2019 novel coronavirus in Wuhan, China. *Lancet.* 2020; 395: 497-506.
- 328 2 Ong SWX, Tan YK, Chia PY, Lee TH, Ng OT, Wong MSY, *et al.* Air, Surface  
329 Environmental, and Personal Protective Equipment Contamination by Severe Acute Respiratory  
330 Syndrome Coronavirus 2 (SARS-CoV-2) From a Symptomatic Patient. *JAMA.* 2020.
- 331 3 Jiang X, Rayner S, Luo MH. Does SARS-CoV-2 has a longer incubation period than  
332 SARS and MERS? *J Med Virol.* 2020; 92: 476-78.
- 333 4 Li R, Pei S, Chen B, Song Y, Zhang T, Yang W, *et al.* Substantial undocumented  
334 infection facilitates the rapid dissemination of novel coronavirus (SARS-CoV2). *Science.* 2020.
- 335 5 Wu Z, McGoogan JM. Characteristics of and Important Lessons From the Coronavirus  
336 Disease 2019 (COVID-19) Outbreak in China: Summary of a Report of 72 314 Cases From the  
337 Chinese Center for Disease Control and Prevention. *JAMA.* 2020.
- 338 6 Yang X, Yu Y, Xu J, Shu H, Xia J, Liu H, *et al.* Clinical course and outcomes of  
339 critically ill patients with SARS-CoV-2 pneumonia in Wuhan, China: a single-centered,  
340 retrospective, observational study. *Lancet Respir Med.* 2020.
- 341 7 Zhou F, Yu T, Du R, Fan G, Liu Y, Liu Z, *et al.* Clinical course and risk factors for  
342 mortality of adult inpatients with COVID-19 in Wuhan, China: a retrospective cohort study.  
343 *Lancet.* 2020.
- 344 8 Lau H, Khosrawipour V, Kocbach P, Mikolajczyk A, Ichii H, Schubert J, *et al.*  
345 Internationally lost COVID-19 cases. *Journal of Microbiology, Immunology and Infection.* 2020.
- 346 9 Matt V, Matthew H. The retrospective chart review: important methodological  
347 considerations. *Journal of educational evaluation for health professions.* 2013; 10.

- 348 10 Delgado-Rodríguez M, Llorca J. Bias. *J Epidemiol Community Health*. 2004; 58: 635-41.
- 349 11 Bauchner H, Golub RM, Zylke J. Editorial Concern-Possible Reporting of the Same  
350 Patients With COVID-19 in Different Reports. *JAMA*. 2020.
- 351 12 Wan X, Wang W, Liu J, Tong T. Estimating the sample mean and standard deviation  
352 from the sample size, median, range and/or interquartile range. *BMC Med Res Methodol*. 2014;  
353 14: 135.
- 354 13 DerSimonian R, Laird N. Meta-analysis in clinical trials. *Controlled clinical trials*. 1986;  
355 7: 177-88.
- 356 14 Friedrich JO, Adhikari NK, Beyene J. Inclusion of zero total event trials in meta-analyses  
357 maintains analytic consistency and incorporates all available data. *BMC Med Res Methodol*.  
358 2007; 7: 5.
- 359 15 Patsopoulos NA, Evangelou E, Ioannidis JP. Sensitivity of between-study heterogeneity  
360 in meta-analysis: proposed metrics and empirical evaluation. *Int J Epidemiol*. 2008; 37: 1148-57.
- 361 16 Duval S, Tweedie R. A nonparametric “trim and fill” method of accounting for  
362 publication bias in meta-analysis. *Journal of the American Statistical Association*. 2000; 95: 89-  
363 98.
- 364 17 Duval S, Tweedie R. Trim and fill: A simple funnel-plot-based method of testing and  
365 adjusting for publication bias in meta-analysis. *Biometrics*. 2000; 56: 455-63.
- 366 18 Higgins J, Thompson SG. Quantifying heterogeneity in a meta-analysis. *Statistics in*  
367 *medicine*. 2002; 21: 1539-58.
- 368 19 Higgins JP, Green S. *Cochrane handbook for systematic reviews of interventions*: Wiley  
369 Online Library 2008.

21

370 20 Thompson SG, Sharp SJ. Explaining heterogeneity in meta-analysis: a comparison of  
371 methods. *Statistics in medicine*. 1999; 18: 2693-708.

372 21 Organization WH. Clinical management of severe acute respiratory infection (SARI)  
373 when COVID-19 disease is suspected: interim guidance, 13 March 2020. World Health  
374 Organization: 2020.

375 22 Organization WH. Coronavirus disease 2019 (COVID-19)  
376 Situation Report – 40. World Health Organization: 2020.

377 23 Lipsitch M, Donnelly CA, Fraser C, Blake IM, Cori A, Dorigatti I, *et al*. Potential Biases  
378 in Estimating Absolute and Relative Case-Fatality Risks during Outbreaks. *PLoS Negl Trop Dis*.  
379 2015; 9: e0003846.

380 24 Ji Y, Ma Z, Peppelenbosch MP, Pan Q. Potential association between COVID-19  
381 mortality and health-care resource availability. *Lancet Glob Health*. 2020.

382 25 Ferguson NM, Laydon D, Nedjati-Gilani G, Imai N, Ainslie K, Baguelin M, *et al*. Impact  
383 of non-pharmaceutical interventions (NPIs) to reduce COVID-19 mortality and healthcare  
384 demand.

385 26 Baud D, Qi X, Nielsen-Saines K, Musso D, Pomar L, Favre G. Real estimates of  
386 mortality following COVID-19 infection. *Lancet Infect Dis*. 2020.

387 27 Fang L, Karakiulakis G, Roth M. Are patients with hypertension and diabetes mellitus at  
388 increased risk for COVID-19 infection? *Lancet Respir Med*. 2020.

389 28 Mao B, Liu Y, Chai Y-h, Jin X-y, Luo HW, Yang J-w, *et al*. Early Discern COVID-19  
390 from the Suspected Patients via Fever Clinics: A Multicenter Cohort Study from Shanghai. 2020.

391

392

393

## **Supplementary Appendix**

### **Title**

395 Case fatality rate in COVID-19: a systematic review and meta-analysis

396

### **Authors**

398 Chanaka Kahathuduwa (MBBS, PhD)<sup>1,2,3</sup>, Chathurika Dhanasekara (MBBS, PhD)<sup>4</sup>, Shao-Hua

399 Chin (PhD)<sup>5</sup>

400

### **Affiliations**

402 <sup>1</sup> Department of Laboratory Science and Primary Care, Texas Tech University Health Sciences  
403 Center, Lubbock, Texas, USA.

404 <sup>2</sup> Department of Psychiatry, Texas Tech University Health Sciences Center, Lubbock, Texas,  
405 USA.

406 <sup>3</sup> Department of Physiology, University of Peradeniya, Peradeniya, Sri Lanka.

407 <sup>4</sup> Department of Surgery, Texas Tech University Health Sciences Center, Lubbock, Texas, USA.

408 <sup>5</sup> Department of Medical Science, Protech Pharmservices Corporation, Taipei City, Taiwan.

409

### **Correspondence to:**

411 Dr. Chanaka N. Kahathuduwa, Department of Laboratory Science and Primary Care, Texas Tech  
412 University Health Sciences Center, 3601 4th Street, Lubbock TX 79430

413 Email: chanaka.kahathuduwa@ttuhsc.edu; Phone: +1- 806-743-2800; Fax: +1-806-743-2784

414

415 **Table S1:** Keywords and keyword combinations used to screen the PubMed, Scopus, and Web  
416 of Science electronic databases

|                                                                                                                                                                                                                                                      |
|------------------------------------------------------------------------------------------------------------------------------------------------------------------------------------------------------------------------------------------------------|
| (covid-19) OR (((corona OR coronavirus)) AND wuhan) OR (2019 novel coronavirus infection) OR (COVID19) OR (coronavirus disease 2019) OR (coronavirus disease-19) OR (2019-nCoV disease) OR (2019 novel coronavirus disease) OR (2019-nCoV infection) |
|------------------------------------------------------------------------------------------------------------------------------------------------------------------------------------------------------------------------------------------------------|

417  
418  
419  
420  
421  
422  
423  
424  
425  
426  
427  
428  
429  
430

431 **Table S2:** Studies meeting eligibility criteria.

| Study                             | Country | Study Site                                                                                            | Study Period | Sample Size | Severe / Critical Illness | Critical Illness | Mortality | Quality † |         | Special Remarks |
|-----------------------------------|---------|-------------------------------------------------------------------------------------------------------|--------------|-------------|---------------------------|------------------|-----------|-----------|---------|-----------------|
|                                   |         |                                                                                                       |              |             |                           |                  |           | Rater 1   | Rater 2 |                 |
| Cai et al. (2020) <sup>1</sup>    | China   | Children's Hospital in Shanghai, Hainan, Hefei and Qingdao                                            | Jan19-Feb03  | 10          | 0                         | 0                | 0         | Good      | Good    | Children        |
| Chen C et al. (2020) <sup>2</sup> | China   | Fever clinic of Tongji Hospital in Wuhan                                                              | Jan-Feb      | 150         | NA                        | 24               | 11        | Good      | Good    |                 |
| Chen H et al. (2020) <sup>3</sup> | China   | Zhongnan Hospital of Wuhan University                                                                 | Jan20-Jan31  | 9           | 0                         | 0                | 0         | Good      | Good    | Pregnant women  |
| Chen L et al. (2020) <sup>4</sup> | China   | Tongji hospital affiliated to Tongji medical college of Huazhong University of Science and Technology | Jan14-Jan29  | 29          | 14                        | 5                | 2         | Good      | Good    |                 |
| Chen N et al. (2020) <sup>5</sup> | China   | Wuhan Jinyintan Hospital                                                                              | Jan01-Jan20  | 99          | 33                        | 23               | 11        | Good      | Good    |                 |



|                                   |       |                                                             |             |     |    |    |    |      |      |          |
|-----------------------------------|-------|-------------------------------------------------------------|-------------|-----|----|----|----|------|------|----------|
| Chen W et al. (2020) <sup>6</sup> | China | Guangzhou Eighth People's Hospital                          | NA          | 57  | 18 | NA | NA | Fair | Poor |          |
| Feng et al. (2020)                | China | Third People's Hospital of Shenzhen                         | Jan16-Feb06 | 15  | 0  | 0  | 0  | Fair | Good | Children |
| Li K et al. (2020) <sup>7</sup>   | China | Second Affiliated Hospital of Chongqing Medical University  | Jan-Feb     | 83  | 25 | 0  | NA | Good | Good |          |
| Li Y et al. (2020) <sup>8</sup>   | China | Wuhan No. 4 Hospital                                        | Jan-Feb     | 54  | 14 | NA | 0  | Good | Good |          |
| Liu C et al. (2020) <sup>9</sup>  | China | First Hospital of Lanzhou University                        | Jan23-Feb08 | 32  | 4  | NA | 0  | Fair | Fair |          |
| Liu K et al. (2020) <sup>10</sup> | China | Respiratory Departments of Nine Tertiary Hospitals in Hubei | Dec30-Jan24 | 137 | 34 | 26 | 16 | Good | Good |          |
| Liu W et al. (2020) <sup>11</sup> | China | Three Tertiary Care Centers in Wuhan -                      | Dec30-Jan15 | 78  | 20 | 8  | 2  | Good | Good |          |

|                                        |       |                                                                 |             |     |    |    |   |      |      |          |
|----------------------------------------|-------|-----------------------------------------------------------------|-------------|-----|----|----|---|------|------|----------|
|                                        |       | The Central Hospital; Tongji Hospital; Wuhan Pulmonary Hospital |             |     |    |    |   |      |      |          |
| Liu Y et al. (2020) <sup>12</sup>      | China | Shenzhen Third People's Hospital                                | Jan11-Jan20 | 12  | 9  | 3  | 0 | Good | Good |          |
| Tian et al. (2020) <sup>13</sup>       | China | Beijing Emergency Medical Service (EMS)                         | Jan20-Feb10 | 262 | 46 | 0  | 3 | Good | Good |          |
| Wang D et al. (2020) (a) <sup>14</sup> | China | 21 hospitals in 17 cities of Northern China                     | Jan25-Feb21 | 31  | 0  | 0  | 0 | Fair | Good | Children |
| Wang D et al. (2020) (b) <sup>15</sup> | China | Zhongnan Hospital of Wuhan University                           | Jan01-Jan28 | 138 | 36 | 36 | 6 | Good | Good |          |
| Wang L et al. (2020) <sup>16</sup>     | China | e First Affiliated Hospital of Zhengzhou University             | Jan21-Feb05 | 18  | NA | 2  | 0 | Good | Good |          |
| Wu J et al.                            | China | Three Grade IIIA                                                | Jan22-Feb14 | 80  | 3  | 3  | 0 | Good | Good |          |

|                                 |           |                                                                            |                 |     |    |    |   |      |      |          |
|---------------------------------|-----------|----------------------------------------------------------------------------|-----------------|-----|----|----|---|------|------|----------|
| (2020)<br>17                    |           | hospitals of<br>Jiangsu                                                    |                 |     |    |    |   |      |      |          |
| Wu W<br>et al.<br>(2020)<br>18  | China     | Breguet<br>Department<br>Store                                             | Jan19-<br>Jan25 | 40  | 17 | 4  | 2 | Good | Good |          |
| Xia W<br>et al.<br>(2020)<br>19 | China     | Wuhan<br>Children's<br>Hospital                                            | Jan23-<br>Feb8  | 20  | 1  | 0  | 0 | Fair | Good | Children |
| Xu X et<br>al.<br>(2020)<br>20  | China     | Zhejiang<br>Province                                                       | Jan10-<br>Jan26 | 62  | 1  | 1  | 0 | Good | Good |          |
| Xu Y et<br>al.<br>(2020)<br>21  | China     | The Fifth<br>Medical<br>Center of<br>Chinese<br>PLA<br>General<br>Hospital | Jan-Feb         | 50  | 13 | 3  | 0 | Good | Good |          |
| Yang et<br>al.<br>(2020)<br>22  | China     | Multi-center<br>study in<br>Wenzhou<br>city,<br>Zhejiang                   | Jan17-<br>Feb10 | 149 | 23 | 23 | 0 | Good | Good |          |
| Yao et<br>al.<br>(2020)<br>23   | China     | Shaanxi<br>Province                                                        | Jan01-<br>Feb07 | 195 | 5  | 5  | 0 | Fair | Good |          |
| Young<br>et al.                 | Singapore | Singapore                                                                  | Jan22-<br>Jan31 | 18  | 6  | 2  | 0 | Good | Good |          |

|                                   |       |                                                                    |                 |     |    |    |    |      |      |  |
|-----------------------------------|-------|--------------------------------------------------------------------|-----------------|-----|----|----|----|------|------|--|
| (2020)<br>24                      |       |                                                                    |                 |     |    |    |    |      |      |  |
| Zhang J<br>et al.<br>(2020)<br>25 | China | No. 7<br>Hospital of<br>Wuhan                                      | Jan16-<br>Feb03 | 140 | 58 | NA | NA | Good | Good |  |
| Zhang<br>M et al.<br>(2020)<br>26 | China | Beijing<br>Tsinghua<br>Changgeng<br>Hospital                       | Jan18-<br>Feb03 | 9   | 0  | 0  | 0  | Good | Good |  |
| Zhao et<br>al.<br>(2020)<br>27    | China | Radiology<br>Quality<br>Control<br>Center,<br>Hunan                | NA              | 101 | 14 | NA | NA | Good | Fair |  |
| Zhu et<br>al.<br>(2020)<br>28     | China | Second<br>Xiangya<br>Hospital of<br>Central<br>South<br>University | Dec01-<br>Feb15 | 12  | 0  | 0  | 0  | Good | Good |  |

432

433 † Quality of studies were examined using the National Heart, Lung and Blood Institute's 9-item

434 Quality Assessment Tool for Case Series Studies.

435

436 **Table S3:** Summary statistics of all covariates used in the univariate meta-regression analyses.

| Variable                     | Events | Total | Studies | Pooled Effect Size (95%CI) † |                          |
|------------------------------|--------|-------|---------|------------------------------|--------------------------|
|                              |        |       |         | Fixed-effects model          | Random-effects model     |
| <b>Demographic variables</b> |        |       |         |                              |                          |
| Age (years)                  | NA     | 2033  | 28      | 32.847 (32.344 - 33.350)     | 41.148 (32.737 - 49.558) |
| Age ≤ 18 years               | 110    | 1349  | 22      | 0.082 (0.068 - 0.097)        | 0.025 (0.002 - 0.274)    |
| Age ≥ 60 years               | 178    | 975   | 15      | 0.183 (0.160 - 0.208)        | 0.064 (0.019 - 0.196)    |
| Female                       | 941    | 2033  | 28      | 0.463 (0.441 - 0.485)        | 0.466 (0.431 - 0.500)    |
| <b>Past medical history</b>  |        |       |         |                              |                          |
| DM-2                         | 123    | 1420  | 22      | 0.087 (0.073 - 0.102)        | 0.102 (0.069 - 0.148)    |
| Hypertension                 | 228    | 1090  | 19      | 0.209 (0.186 - 0.234)        | 0.120 (0.069 - 0.201)    |
| Cardiac disease              | 127    | 1121  | 18      | 0.113 (0.096 - 0.133)        | 0.060 (0.029 - 0.120)    |
| Chronic liver disease        | 23     | 926   | 18      | 0.025 (0.017 - 0.037)        | 0.010 (0.003 - 0.037)    |
| Chronic kidney disease       | 12     | 926   | 18      | 0.013 (0.007 - 0.023)        | 0.013 (0.007 - 0.023)    |
| Malignancy                   | 34     | 1216  | 19      | 0.028 (0.020 - 0.039)        | 0.024 (0.014 - 0.040)    |
| COPD                         | 19     | 1014  | 12      | 0.019 (0.012 - 0.029)        | 0.018 (0.010 - 0.031)    |
| Low immunity                 | 2      | 236   | 3       | 0.008 (0.002 - 0.033)        | 0.008 (0.002 - 0.033)    |
| Smoking                      | 16     | 247   | 3       | 0.065 (0.040 - 0.103)        | 0.065 (0.040 - 0.103)    |
| Pregnant                     | 11     | 506   | 11      | 0.022 (0.012 - 0.039)        | 0.000 (0.000 - 0.386)    |
| <b>Presenting symptoms</b>   |        |       |         |                              |                          |
| Asymptomatic                 | 24     | 618   | 11      | 0.039 (0.026 - 0.057)        | 0.009 (0.001 - 0.084)    |
| Fever                        | 1310   | 1578  | 24      | 0.830 (0.811 - 0.848)        | 0.833 (0.778 - 0.877)    |
| Cough                        | 992    | 1656  | 25      | 0.599 (0.575 - 0.622)        | 0.619 (0.539 - 0.693)    |
| Sore throat                  | 121    | 909   | 16      | 0.133 (0.113 - 0.157)        | 0.131 (0.085 - 0.197)    |
| Tachypnea                    | 138    | 325   | 7       | 0.425 (0.372 - 0.479)        | 0.084 (0.010 - 0.461)    |
| Dyspnea                      | 245    | 1452  | 20      | 0.169 (0.150 - 0.189)        | 0.102 (0.053 - 0.186)    |
| Myalgia                      | 163    | 801   | 14      | 0.203 (0.177 - 0.233)        | 0.192 (0.123 - 0.288)    |
| Fatigue                      | 328    | 762   | 11      | 0.430 (0.396 - 0.466)        | 0.336 (0.198 - 0.508)    |
| Headache                     | 136    | 1253  | 16      | 0.109 (0.092 - 0.127)        | 0.103 (0.071 - 0.146)    |
| Diarrhea                     | 104    | 1288  | 21      | 0.081 (0.067 - 0.097)        | 0.078 (0.059 - 0.104)    |

| <b>Laboratory investigations ‡</b>        |      |      |    |                       |                       |
|-------------------------------------------|------|------|----|-----------------------|-----------------------|
| Nucleic acid test positive                | 1529 | 1617 | 22 | 0.946 (0.933 - 0.956) | 1.000 (0.916 - 1.000) |
| Leukopenia                                | 258  | 940  | 16 | 0.274 (0.247 - 0.304) | 0.217 (0.111 - 0.380) |
| Leukocytosis                              | 99   | 899  | 16 | 0.110 (0.091 - 0.132) | 0.082 (0.048 - 0.137) |
| Thrombocytopenia                          | 73   | 472  | 8  | 0.155 (0.125 - 0.190) | 0.137 (0.078 - 0.229) |
| Lymphopenia                               | 476  | 988  | 17 | 0.482 (0.451 - 0.513) | 0.410 (0.289 - 0.543) |
| High LDH                                  | 220  | 526  | 9  | 0.418 (0.377 - 0.461) | 0.433 (0.242 - 0.646) |
| Low Albumin                               | 156  | 423  | 6  | 0.369 (0.324 - 0.416) | 0.340 (0.063 - 0.797) |
| High CRP                                  | 650  | 930  | 17 | 0.699 (0.669 - 0.728) | 0.668 (0.534 - 0.780) |
| High ESR                                  | 193  | 245  | 4  | 0.788 (0.732 - 0.834) | 0.795 (0.701 - 0.866) |
| High procalcitonin                        | 152  | 594  | 12 | 0.256 (0.222 - 0.293) | 0.175 (0.071 - 0.370) |
| High D-dimer                              | 117  | 504  | 7  | 0.232 (0.197 - 0.271) | 0.188 (0.095 - 0.338) |
| <b>Radiological features on CT thorax</b> |      |      |    |                       |                       |
| No lesion on CT                           | 95   | 894  | 16 | 0.106 (0.088 - 0.128) | 0.078 (0.035 - 0.165) |
| Patchy consolidation                      | 231  | 551  | 11 | 0.419 (0.379 - 0.461) | 0.418 (0.314 - 0.530) |
| Ground glass opacities                    | 416  | 754  | 15 | 0.552 (0.516 - 0.587) | 0.693 (0.487 - 0.843) |
| Peripheral distribution                   | 177  | 229  | 6  | 0.773 (0.714 - 0.823) | 0.849 (0.516 - 0.967) |
| Bilateral or $\geq 3$ lobe involvement    | 721  | 953  | 15 | 0.757 (0.728 - 0.783) | 0.711 (0.575 - 0.817) |

437

438 † Effect size measure is mean for age. For all other variables, it is the proportion of individuals (i.e.  
 439 events) out of total sample size.

440 ‡ Biochemical parameters have been interpreted as low / high based on reference ranges considered in  
 441 each study.

442

443

444 **Table S4:** Results of all univariate meta-regression analyses examining the moderator effects of  
 445 the covariates on the prevalence of combined severe or critical illness in COVID-19.

| Model                        | Variable                                                        | Coefficient † | SE     | 95%CI             | Z      | p      |
|------------------------------|-----------------------------------------------------------------|---------------|--------|-------------------|--------|--------|
| <b>Demographic variables</b> |                                                                 |               |        |                   |        |        |
| 1                            | Intercept                                                       | -5.921        | 1.236  | -8.344 to -3.498  | -4.789 | <0.001 |
|                              | Age                                                             | 0.093         | 0.026  | 0.043 to 0.144    | 3.634  | <0.001 |
|                              | k = 26, $\tau^2 = 0.781$ , I <sup>2</sup> = 88.428, QM = 13.206 |               |        |                   |        |        |
| 2                            | Intercept                                                       | -1.400        | 0.310  | -2.006 to -0.794  | -4.524 | <0.001 |
|                              | Age ≤ 18 years                                                  | -3.450        | 1.287  | -5.972 to -0.927  | -2.680 | 0.007  |
|                              | k = 21, $\tau^2 = 1.172$ , I <sup>2</sup> = 91.709, QM = 7.182  |               |        |                   |        |        |
| 3                            | Intercept                                                       | -3.599        | 0.461  | -4.502 to -2.695  | -7.806 | <0.001 |
|                              | Age ≥ 60 years                                                  | 8.367         | 1.720  | 4.997 to 11.738   | 4.866  | <0.001 |
|                              | k = 15, $\tau^2 = 0.573$ , I <sup>2</sup> = 77.484, QM = 23.679 |               |        |                   |        |        |
| 4                            | Intercept                                                       | -0.491        | 1.196  | -2.836 to 1.853   | -0.411 | 0.681  |
|                              | Female                                                          | -2.836        | 2.517  | -7.769 to 2.397   | -1.127 | 0.260  |
|                              | k = 26, $\tau^2 = 1.771$ , I <sup>2</sup> = 94.515, QM = 1.270  |               |        |                   |        |        |
| <b>Past medical history</b>  |                                                                 |               |        |                   |        |        |
| 5                            | Intercept                                                       | -2.344        | 0.471  | -3.267 to -1.421  | -4.978 | <0.001 |
|                              | DM-2                                                            | 3.632         | 2.161  | -0.603 to 7.868   | 1.681  | 0.093  |
|                              | k = 20, $\tau^2 = 1.532$ , I <sup>2</sup> = 93.418, QM = 2.826  |               |        |                   |        |        |
| 6                            | Intercept                                                       | -2.966        | 0.556  | -4.056 to -1.877  | -5.338 | <0.001 |
|                              | Hypertension                                                    | 8.381         | 2.456  | 3.567 to 13.194   | 3.413  | <0.001 |
|                              | k = 17, $\tau^2 = 1.009$ , I <sup>2</sup> = 88.950, QM = 11.646 |               |        |                   |        |        |
| 7                            | Intercept                                                       | -2.112        | 0.476  | -3.045 to -1.179  | -4.436 | <0.001 |
|                              | Cardiac disease                                                 | 4.801         | 2.649  | -0.392 to 9.993   | 1.812  | 0.070  |
|                              | k = 16, $\tau^2 = 1.211$ , I <sup>2</sup> = 91.573, QM = 3.283  |               |        |                   |        |        |
| 8                            | Intercept                                                       | -2.274        | 0.654  | -3.555 to -0.992  | -3.476 | <0.001 |
|                              | Chronic liver disease                                           | 4.698         | 15.493 | -25.668 to 35.064 | 0.303  | 0.762  |
|                              | k = 16, $\tau^2 = 3.223$ , I <sup>2</sup> = 94.655, QM = 0.092  |               |        |                   |        |        |
| 9                            | Intercept                                                       | -2.411        | 0.507  | -3.405 to -1.417  | -4.756 | <0.001 |
|                              | Chronic kidney disease                                          | 21.831        | 10.504 | 1.244 to 42.419   | 2.078  | 0.038  |
|                              | k = 16, $\tau^2 = 2.235$ , I <sup>2</sup> = 93.455, QM = 4.320  |               |        |                   |        |        |
| 10                           | Intercept                                                       | -2.366        | 0.441  | -3.230 to -1.501  | -5.363 | <0.001 |
|                              | Malignancy                                                      | 24.845        | 10.920 | 3.442 to 46.247   | 2.275  | 0.023  |
|                              | k = 17, $\tau^2 = 0.960$ , I <sup>2</sup> = 89.464, QM = 5.176  |               |        |                   |        |        |
| 11                           | Intercept                                                       | -1.827        | 0.399  | -2.609 to -1.045  | -4.580 | <0.001 |
|                              | COPD                                                            | 27.432        | 12.227 | 3.467 to 51.397   | 2.243  | 0.025  |
|                              | k = 11, $\tau^2 = 0.733$ , I <sup>2</sup> = 91.466, QM = 5.033  |               |        |                   |        |        |

|                            |                                                                 |         |         |                    |        |        |
|----------------------------|-----------------------------------------------------------------|---------|---------|--------------------|--------|--------|
| 12                         | Intercept                                                       | -2.020  | 0.713   | -3.416 to -5.623   | -2.835 | 0.005  |
|                            | Low immunity                                                    | 66.920  | 78.023  | -86.003 to 219.842 | 0.858  | 0.391  |
|                            | k = 3, $\tau_2 = 0.733$ , I <sup>2</sup> = 71.082, QM = 0.736   |         |         |                    |        |        |
| 13                         | Intercept                                                       | -8.862  | 6.638   | -21.872 to 4.148   | -1.335 | 0.182  |
|                            | Smoking                                                         | 127.878 | 101.797 | -71.641 to 327.397 | 1.256  | 0.209  |
|                            | k = 3, $\tau_2 = 0.048$ , I <sup>2</sup> = 50.308, QM = 1.578   |         |         |                    |        |        |
| 14                         | Intercept                                                       | -2.088  | 0.618   | -3.299 to -2.876   | -3.377 | <0.001 |
|                            | Pregnant                                                        | -4.395  | 6.052   | -16.256 to 7.466   | -0.726 | 0.468  |
|                            | k = 10, $\tau_2 = 2.133$ , I <sup>2</sup> = 90.869, QM = 0.527  |         |         |                    |        |        |
| <b>Presenting symptoms</b> |                                                                 |         |         |                    |        |        |
| 15                         | Intercept                                                       | -1.287  | 0.486   | -2.240 to -2.334   | -2.647 | 0.008  |
|                            | Asymptomatic                                                    | -5.774  | 4.980   | -15.534 to 3.987   | -1.159 | 0.246  |
|                            | k = 11, $\tau_2 = 1.549$ , I <sup>2</sup> = 92.081, QM = 1.344  |         |         |                    |        |        |
| 16                         | Intercept                                                       | -8.760  | 2.003   | -12.685 to -4.835  | -4.374 | <0.001 |
|                            | Fever                                                           | 8.772   | 2.378   | 4.111 to 13.432    | 3.689  | <0.001 |
|                            | k = 23, $\tau_2 = 0.641$ , I <sup>2</sup> = 86.409, QM = 13.607 |         |         |                    |        |        |
| 17                         | Intercept                                                       | -3.308  | 0.987   | -5.242 to -1.374   | -3.353 | <0.001 |
|                            | Cough                                                           | 2.736   | 1.492   | -0.187 to 5.665    | 1.834  | 0.067  |
|                            | k = 24, $\tau_2 = 1.280$ , I <sup>2</sup> = 92.822, QM = 3.365  |         |         |                    |        |        |
| 18                         | Intercept                                                       | -1.698  | 0.456   | -2.590 to -7.854   | -3.725 | <0.001 |
|                            | Sore throat                                                     | -0.410  | 1.971   | -4.272 to 3.452    | -0.208 | 0.835  |
|                            | k = 15, $\tau_2 = 1.035$ , I <sup>2</sup> = 89.939, QM = 0.043  |         |         |                    |        |        |
| 19                         | Intercept                                                       | -3.773  | 1.205   | -6.134 to -1.411   | -3.131 | 0.002  |
|                            | Tachypnea                                                       | 5.104   | 2.616   | -0.023 to 19.231   | 1.951  | 0.051  |
|                            | k = 7, $\tau_2 = 1.774$ , I <sup>2</sup> = 89.572, QM = 3.806   |         |         |                    |        |        |
| 20                         | Intercept                                                       | -1.997  | 0.354   | -2.691 to -1.322   | -5.636 | <0.001 |
|                            | Dyspnea                                                         | 3.056   | 1.392   | 0.327 to 5.784     | 2.195  | 0.028  |
|                            | k = 19, $\tau_2 = 0.680$ , I <sup>2</sup> = 88.759, QM = 4.817  |         |         |                    |        |        |
| 21                         | Intercept                                                       | -2.227  | 0.749   | -3.695 to -6.758   | -2.972 | 0.003  |
|                            | Myalgia                                                         | 3.541   | 2.648   | -1.648 to 8.731    | 1.338  | 0.181  |
|                            | k = 13, $\tau_2 = 1.323$ , I <sup>2</sup> = 91.941, QM = 1.789  |         |         |                    |        |        |
| 22                         | Intercept                                                       | -2.466  | 0.685   | -3.809 to -1.124   | -3.600 | <0.001 |
|                            | Fatigue                                                         | 2.702   | 1.388   | -0.018 to 5.421    | 1.947  | 0.052  |
|                            | k = 11, $\tau_2 = 0.730$ , I <sup>2</sup> = 87.246, QM = 3.791  |         |         |                    |        |        |
| 23                         | Intercept                                                       | -0.803  | 0.471   | -1.727 to 1.129    | -1.705 | 0.088  |
|                            | Headache                                                        | -5.361  | 3.194   | -11.621 to 4.899   | -1.679 | 0.093  |
|                            | k = 15, $\tau_2 = 1.153$ , I <sup>2</sup> = 93.398, QM = 2.817  |         |         |                    |        |        |
| 24                         | Intercept                                                       | -2.590  | 0.566   | -3.699 to -1.482   | -4.579 | <0.001 |
|                            | Diarrhea                                                        | 11.680  | 5.237   | 1.415 to 21.944    | 2.230  | 0.026  |
|                            | k = 20, $\tau_2 = 1.139$ , I <sup>2</sup> = 91.537, QM = 4.974  |         |         |                    |        |        |



| <b>Laboratory investigations ‡</b>        |                                                     |         |       |                   |         |        |
|-------------------------------------------|-----------------------------------------------------|---------|-------|-------------------|---------|--------|
| 25                                        | Intercept                                           | -0.521  | 0.404 | -1.311 to 8.272   | -1.291  | 0.197  |
|                                           | Nucleic acid test positive                          | -1.370  | 0.423 | -2.199 to -9.545  | -3.235  | 0.001  |
|                                           | k = 21, $\tau_2 = 1.477$ , I2 = 94.363, QM = 10.464 |         |       |                   |         |        |
| 26                                        | Intercept                                           | -1.904  | 0.734 | -3.343 to -3.465  | -2.594  | 0.009  |
|                                           | Leukopenia                                          | -0.357  | 1.926 | -4.132 to 3.418   | -0.185  | 0.853  |
|                                           | k = 15, $\tau_2 = 2.855$ , I2 = 96.044, QM = 0.034  |         |       |                   |         |        |
| 27                                        | Intercept                                           | -3.166  | 0.857 | -4.845 to -1.487  | -3.696  | <0.001 |
|                                           | Leukocytosis                                        | 8.608   | 5.659 | -2.482 to 19.699  | 1.521   | 0.128  |
|                                           | k = 15, $\tau_2 = 2.690$ , I2 = 95.111, QM = 2.314  |         |       |                   |         |        |
| 28                                        | Intercept                                           | -3.945  | 1.260 | -6.414 to -1.476  | -3.132  | 0.002  |
|                                           | Thrombocytopenia                                    | 10.488  | 5.507 | -0.306 to 21.282  | 1.904   | 0.057  |
|                                           | k = 8, $\tau_2 = 2.917$ , I2 = 94.454, QM = 3.627   |         |       |                   |         |        |
| 29                                        | Intercept                                           | -3.871  | 0.840 | -5.518 to -2.224  | -4.607  | <0.001 |
|                                           | Lymphopenia                                         | 4.734   | 1.574 | 1.649 to 7.823    | 3.008   | 0.003  |
|                                           | k = 16, $\tau_2 = 1.213$ , I2 = 90.850, QM = 9.046  |         |       |                   |         |        |
| 30                                        | Intercept                                           | -4.437  | 0.686 | -5.781 to -3.192  | -6.467  | <0.001 |
|                                           | High LDH                                            | 5.769   | 1.164 | 3.488 to 8.054    | 4.957   | <0.001 |
|                                           | k = 9, $\tau_2 = 0.278$ , I2 = 58.546, QM = 24.572  |         |       |                   |         |        |
| 31                                        | Intercept                                           | -1.507  | 0.734 | -2.945 to -5.869  | -2.053  | 0.040  |
|                                           | Low Albumin                                         | 1.299   | 1.384 | -1.414 to 4.312   | 0.938   | 0.348  |
|                                           | k = 6, $\tau_2 = 1.210$ , I2 = 89.774, QM = 0.880   |         |       |                   |         |        |
| 32                                        | Intercept                                           | -4.645  | 1.018 | -6.641 to -2.649  | -4.562  | <0.001 |
|                                           | High CRP                                            | 4.688   | 1.392 | 1.959 to 7.417    | 3.367   | <0.001 |
|                                           | k = 16, $\tau_2 = 0.697$ , I2 = 85.579, QM = 11.335 |         |       |                   |         |        |
| 33                                        | Intercept                                           | 2.608   | 6.597 | -10.323 to 15.538 | 0.395   | 0.693  |
|                                           | High ESR                                            | -5.846  | 8.398 | -22.305 to 11.613 | -0.696  | 0.486  |
|                                           | k = 4, $\tau_2 = 1.636$ , I2 = 84.528, QM = 0.485   |         |       |                   |         |        |
| 34                                        | Intercept                                           | -2.535  | 0.965 | -4.427 to -0.643  | -2.626  | 0.009  |
|                                           | High procalcitonin                                  | 1.146   | 2.476 | -3.707 to 5.999   | 0.463   | 0.644  |
|                                           | k = 11, $\tau_2 = 3.562$ , I2 = 95.576, QM = 0.214  |         |       |                   |         |        |
| 35                                        | Intercept                                           | -2.962  | 0.289 | -3.528 to -2.395  | -10.253 | <0.001 |
|                                           | High D-dimer                                        | 6.110   | 0.830 | 4.484 to 7.736    | 7.365   | <0.001 |
|                                           | k = 7, $\tau_2 = 0.000$ , I2 = 0.000, QM = 54.243   |         |       |                   |         |        |
| <b>Radiological features on CT thorax</b> |                                                     |         |       |                   |         |        |
| 36                                        | Intercept                                           | -1.016  | 0.468 | -1.932 to -8.798  | -2.170  | 0.030  |
|                                           | No lesions on CT                                    | -10.053 | 3.413 | -16.743 to -3.363 | -2.945  | 0.003  |
|                                           | k = 15, $\tau_2 = 1.239$ , I2 = 89.806, QM = 8.675  |         |       |                   |         |        |
| 37                                        | Intercept                                           | -2.639  | 1.142 | -4.878 to -2.461  | -2.311  | 0.021  |
|                                           | Patchy consolidations                               | 1.121   | 2.265 | -3.318 to 5.559   | 0.495   | 0.621  |
|                                           | k = 10, $\tau_2 = 1.261$ , I2 = 88.147, QM = 0.245  |         |       |                   |         |        |

|    |                                                                |        |       |                  |        |        |
|----|----------------------------------------------------------------|--------|-------|------------------|--------|--------|
| 38 | Intercept                                                      | -2.231 | 1.134 | -4.454 to -7.938 | -1.967 | 0.049  |
|    | Ground glass opacities                                         | 0.089  | 1.650 | -3.144 to 3.322  | 0.054  | 0.957  |
|    | k = 14, $\tau^2 = 2.583$ , I <sup>2</sup> = 94.256, QM = 0.003 |        |       |                  |        |        |
| 39 | Intercept                                                      | -6.172 | 3.565 | -13.159 to 7.816 | -1.731 | 0.083  |
|    | Peripheral distribution                                        | 3.966  | 3.959 | -3.794 to 11.725 | 1.002  | 0.317  |
|    | k = 6, $\tau^2 = 1.767$ , I <sup>2</sup> = 83.815, QM = 1.003  |        |       |                  |        |        |
| 40 | Intercept                                                      | -4.974 | 1.267 | -7.457 to -2.492 | -3.927 | <0.001 |
|    | Bilateral or $\geq 3$ lobe involvement                         | 4.435  | 1.627 | 1.246 to 7.624   | 2.725  | 0.006  |
|    | k = 14, $\tau^2 = 0.696$ , I <sup>2</sup> = 87.270, QM = 7.428 |        |       |                  |        |        |

448

449 † Coefficients represent logit-transformed proportions; positive coefficients suggest increased risk and  
 450 negative coefficients suggest decreased risk.

451 ‡ Biochemical parameters have been interpreted as low / high based on reference ranges considered in  
 452 each study.

453

454

455

456

457

458

459

460

461

462 **Table S5:** Results of all univariate meta-regression analyses examining the moderator effects of  
 463 the covariates on the prevalence critical illness in COVID-19.

| Model                        | Variable                                                        | Coefficient † | SE     | 95%CI             | Z      | p      |
|------------------------------|-----------------------------------------------------------------|---------------|--------|-------------------|--------|--------|
| <b>Demographic variables</b> |                                                                 |               |        |                   |        |        |
| 1                            | Intercept                                                       | -8.153        | 2.031  | -12.134 to -4.173 | -4.014 | <0.001 |
|                              | Age                                                             | 0.115         | 0.041  | 0.033 to 6.196    | 2.774  | 0.006  |
|                              | k = 24, $\tau^2 = 1.094$ , I <sup>2</sup> = 85.333, QM = 7.694  |               |        |                   |        |        |
| 2                            | Intercept                                                       | -2.407        | 0.527  | -3.440 to -1.374  | -4.567 | <0.001 |
|                              | Age ≤ 18 years                                                  | -7.526        | 6.892  | -21.034 to 5.981  | -1.092 | 0.275  |
|                              | k = 18, $\tau^2 = 1.635$ , I <sup>2</sup> = 87.100, QM = 1.193  |               |        |                   |        |        |
| 3                            | Intercept                                                       | -5.479        | 0.884  | -7.211 to -3.747  | -6.200 | <0.001 |
|                              | Age ≥ 60 years                                                  | 8.868         | 2.647  | 3.678 to 14.757   | 3.349  | <0.001 |
|                              | k = 13, $\tau^2 = 0.981$ , I <sup>2</sup> = 69.156, QM = 11.219 |               |        |                   |        |        |
| 4                            | Intercept                                                       | -1.157        | 1.429  | -3.957 to 1.644   | -0.809 | 0.418  |
|                              | Female                                                          | -3.934        | 3.082  | -9.975 to 2.157   | -1.276 | 0.202  |
|                              | k = 24, $\tau^2 = 1.890$ , I <sup>2</sup> = 90.774, QM = 1.629  |               |        |                   |        |        |
| <b>Past medical history</b>  |                                                                 |               |        |                   |        |        |
| 5                            | Intercept                                                       | -2.712        | 0.510  | -3.711 to -1.713  | -5.319 | <0.001 |
|                              | DM-2                                                            | 0.581         | 2.220  | -3.770 to 4.932   | 0.262  | 0.794  |
|                              | k = 19, $\tau^2 = 1.405$ , I <sup>2</sup> = 89.782, QM = 0.068  |               |        |                   |        |        |
| 6                            | Intercept                                                       | -4.091        | 0.676  | -5.416 to -2.765  | -6.050 | <0.001 |
|                              | Hypertension                                                    | 8.385         | 2.518  | 3.450 to 13.321   | 3.330  | <0.001 |
|                              | k = 17, $\tau^2 = 0.615$ , I <sup>2</sup> = 74.934, QM = 11.090 |               |        |                   |        |        |
| 7                            | Intercept                                                       | -3.386        | 0.657  | -4.674 to -2.597  | -5.150 | <0.001 |
|                              | Cardiac disease                                                 | 6.745         | 2.970  | 0.924 to 12.565   | 2.271  | 0.023  |
|                              | k = 15, $\tau^2 = 1.058$ , I <sup>2</sup> = 86.342, QM = 5.158  |               |        |                   |        |        |
| 8                            | Intercept                                                       | -2.632        | 0.494  | -3.600 to -1.664  | -5.329 | <0.001 |
|                              | Chronic liver disease                                           | -1.965        | 11.525 | -24.553 to 21.623 | -0.170 | 0.865  |
|                              | k = 15, $\tau^2 = 1.332$ , I <sup>2</sup> = 84.529, QM = 0.029  |               |        |                   |        |        |
| 9                            | Intercept                                                       | -2.850        | 0.463  | -3.757 to -1.944  | -6.161 | <0.001 |
|                              | Chronic kidney disease                                          | 11.613        | 8.335  | -4.722 to 27.949  | 1.393  | 0.163  |
|                              | k = 15, $\tau^2 = 1.185$ , I <sup>2</sup> = 84.105, QM = 1.942  |               |        |                   |        |        |
| 10                           | Intercept                                                       | -2.718        | 0.428  | -3.556 to -1.886  | -6.355 | <0.001 |
|                              | Malignancy                                                      | 20.308        | 9.919  | 0.866 to 39.752   | 2.047  | 0.041  |
|                              | k = 16, $\tau^2 = 0.497$ , I <sup>2</sup> = 75.460, QM = 4.191  |               |        |                   |        |        |
| 11                           | Intercept                                                       | -2.140        | 0.468  | -3.057 to -1.223  | -4.573 | <0.001 |
|                              | COPD                                                            | -3.422        | 14.786 | -32.402 to 25.557 | -0.231 | 0.817  |
|                              | k = 11, $\tau^2 = 1.028$ , I <sup>2</sup> = 89.416, QM = 0.054  |               |        |                   |        |        |

| <b>Presenting symptoms</b>         |                                                    |          |           |                         |        |        |
|------------------------------------|----------------------------------------------------|----------|-----------|-------------------------|--------|--------|
| 12                                 | Intercept                                          | -3.186   | 1.049     | -5.243 to -1.129        | -3.036 | 0.002  |
|                                    | Asymptomatic                                       | -9.113   | 12.896    | -34.389 to 16.162       | -0.707 | 0.480  |
|                                    | k = 9, $\tau_2 = 4.359$ , I2 = 90.352, QM = 0.499  |          |           |                         |        |        |
| 13                                 | Intercept                                          | -10.098  | 3.624     | -17.201 to -2.995       | -2.786 | 0.005  |
|                                    | Fever                                              | 8.525    | 4.236     | 0.224 to 16.827         | 2.013  | 0.044  |
|                                    | k = 20, $\tau_2 = 1.946$ , I2 = 89.018, QM = 4.051 |          |           |                         |        |        |
| 14                                 | Intercept                                          | -4.429   | 1.361     | -7.096 to -1.762        | -3.255 | 0.001  |
|                                    | Cough                                              | 2.421    | 2.119     | -1.732 to 6.574         | 1.142  | 0.253  |
|                                    | k = 21, $\tau_2 = 2.096$ , I2 = 90.704, QM = 1.305 |          |           |                         |        |        |
| 15                                 | Intercept                                          | -2.901   | 0.617     | -4.110 to -1.693        | -4.706 | <0.001 |
|                                    | Sore throat                                        | -0.011   | 2.573     | -5.054 to 5.733         | -0.004 | 0.997  |
|                                    | k = 14, $\tau_2 = 1.552$ , I2 = 87.761, QM = 0.000 |          |           |                         |        |        |
| 16                                 | Intercept                                          | -6.493   | 3.574     | -13.498 to 6.513        | -1.816 | 0.069  |
|                                    | Tachypnea                                          | 4.139    | 6.653     | -8.901 to 17.179        | 0.622  | 0.534  |
|                                    | k = 7, $\tau_2 = 9.745$ , I2 = 92.103, QM = 0.387  |          |           |                         |        |        |
| 17                                 | Intercept                                          | -3.919   | 0.701     | -5.293 to -2.546        | -5.592 | <0.001 |
|                                    | Dyspnea                                            | 5.263    | 2.589     | 0.187 to 19.339         | 2.033  | 0.042  |
|                                    | k = 17, $\tau_2 = 1.935$ , I2 = 90.510, QM = 4.131 |          |           |                         |        |        |
| 18                                 | Intercept                                          | -2.954   | 0.729     | -4.382 to -1.526        | -4.055 | <0.001 |
|                                    | Myalgia                                            | 2.311    | 2.833     | -3.241 to 7.864         | 0.816  | 0.415  |
|                                    | k = 13, $\tau_2 = 1.128$ , I2 = 82.759, QM = 0.666 |          |           |                         |        |        |
| 19                                 | Intercept                                          | -5.730   | 1.452     | -8.575 to -2.884        | -3.947 | <0.001 |
|                                    | Fatigue                                            | 6.841    | 3.255     | 0.462 to 13.221         | 2.102  | 0.036  |
|                                    | k = 9, $\tau_2 = 1.883$ , I2 = 75.036, QM = 4.418  |          |           |                         |        |        |
| 20                                 | Intercept                                          | -2.093   | 0.707     | -3.478 to -4.718        | -2.962 | 0.003  |
|                                    | Headache                                           | -7.333   | 6.010     | -19.113 to 4.446        | -1.220 | 0.222  |
|                                    | k = 15, $\tau_2 = 1.972$ , I2 = 92.662, QM = 1.489 |          |           |                         |        |        |
| 21                                 | Intercept                                          | -3.018   | 0.673     | -4.337 to -1.699        | -4.485 | <0.001 |
|                                    | Diarrhea                                           | 4.228    | 5.997     | -7.525 to 15.981        | 0.705  | 0.481  |
|                                    | k = 18, $\tau_2 = 1.279$ , I2 = 86.591, QM = 0.497 |          |           |                         |        |        |
| <b>Laboratory investigations ‡</b> |                                                    |          |           |                         |        |        |
| 22                                 | Intercept                                          | -728.908 | 26694.139 | -53048.459 to 51594.644 | -0.027 | 0.978  |
|                                    | Nucleic acid test positive                         | 725.702  | 26694.139 | -51593.849 to 53945.253 | 0.027  | 0.978  |
|                                    | k = 18, $\tau_2 = 2.861$ , I2 = 94.023, QM = 0.001 |          |           |                         |        |        |
| 23                                 | Intercept                                          | -2.923   | 0.688     | -4.272 to -1.575        | -4.249 | <0.001 |
|                                    | Leukopenia                                         | -0.149   | 1.679     | -3.440 to 3.141         | -0.089 | 0.929  |
|                                    | k = 15, $\tau_2 = 1.763$ , I2 = 87.768, QM = 0.008 |          |           |                         |        |        |
| 24                                 | Intercept                                          | -3.734   | 0.742     | -5.189 to -2.279        | -5.030 | <0.001 |
|                                    | Leukocytosis                                       | 6.462    | 4.651     | -2.655 to 15.578        | 1.389  | 0.165  |
|                                    | k = 15, $\tau_2 = 1.617$ , I2 = 83.727, QM = 1.930 |          |           |                         |        |        |

|                                           |                                                   |        |       |                  |        |        |
|-------------------------------------------|---------------------------------------------------|--------|-------|------------------|--------|--------|
| 25                                        | Intercept                                         | -3.319 | 0.906 | -5.095 to -1.543 | -3.663 | <0.001 |
|                                           | Thrombocytopenia                                  | 4.623  | 3.915 | -3.049 to 12.296 | 1.181  | 0.238  |
|                                           | k = 8, $\tau_2$ = 1.198, I2 = 85.576, QM = 1.395  |        |       |                  |        |        |
| 26                                        | Intercept                                         | -4.303 | 0.979 | -6.222 to -2.383 | -4.393 | <0.001 |
|                                           | Lymphopenia                                       | 3.533  | 1.996 | -0.378 to 7.444  | 1.770  | 0.077  |
|                                           | k = 15, $\tau_2$ = 1.264, I2 = 81.627, QM = 3.134 |        |       |                  |        |        |
| 27                                        | Intercept                                         | -3.882 | 0.707 | -5.267 to -2.496 | -5.491 | <0.001 |
|                                           | High LDH                                          | 3.392  | 1.137 | 1.164 to 5.621   | 2.984  | 0.003  |
|                                           | k = 8, $\tau_2$ = 0.315, I2 = 51.385, QM = 8.904  |        |       |                  |        |        |
| 28                                        | Intercept                                         | -2.131 | 0.308 | -2.735 to -1.527 | -6.914 | <0.001 |
|                                           | Low Albumin                                       | 0.994  | 0.517 | -0.019 to 2.318  | 1.923  | 0.055  |
|                                           | k = 5, $\tau_2$ = 0.081, I2 = 27.279, QM = 3.697  |        |       |                  |        |        |
| 29                                        | Intercept                                         | -6.561 | 1.654 | -9.803 to -3.319 | -3.967 | <0.001 |
|                                           | High CRP                                          | 5.696  | 2.155 | 1.471 to 9.921   | 2.642  | 0.008  |
|                                           | k = 14, $\tau_2$ = 0.741, I2 = 74.102, QM = 6.983 |        |       |                  |        |        |
| 30                                        | Intercept                                         | -2.584 | 0.805 | -4.161 to -1.936 | -3.209 | 0.001  |
|                                           | High procalcitonin                                | -6.018 | 4.132 | -14.116 to 2.081 | -1.456 | 0.145  |
|                                           | k = 10, $\tau_2$ = 2.030, I2 = 78.770, QM = 2.121 |        |       |                  |        |        |
| 31                                        | Intercept                                         | -3.367 | 0.736 | -4.808 to -1.925 | -4.577 | <0.001 |
|                                           | High D-dimer                                      | 6.185  | 2.671 | 0.950 to 11.421  | 2.315  | 0.021  |
|                                           | k = 5, $\tau_2$ = 0.221, I2 = 39.400, QM = 5.361  |        |       |                  |        |        |
| <b>Radiological features on CT thorax</b> |                                                   |        |       |                  |        |        |
| 32                                        | Intercept                                         | -2.481 | 0.621 | -3.698 to -1.265 | -3.998 | <0.001 |
|                                           | No lesions on CT                                  | -6.518 | 3.726 | -13.821 to 2.786 | -1.749 | 0.080  |
|                                           | k = 14, $\tau_2$ = 1.473, I2 = 79.098, QM = 3.059 |        |       |                  |        |        |
| 33                                        | Intercept                                         | -2.430 | 1.574 | -5.514 to 9.656  | -1.544 | 0.123  |
|                                           | Patchy consolidations                             | -2.949 | 3.633 | -10.070 to 4.171 | -0.812 | 0.417  |
|                                           | k = 10, $\tau_2$ = 2.026, I2 = 77.274, QM = 0.659 |        |       |                  |        |        |
| 34                                        | Intercept                                         | -1.955 | 0.893 | -3.705 to -6.204 | -2.188 | 0.029  |
|                                           | Ground glass opacities                            | -1.912 | 1.387 | -4.630 to 8.856  | -1.379 | 0.168  |
|                                           | k = 14, $\tau_2$ = 1.354, I2 = 81.205, QM = 1.901 |        |       |                  |        |        |
| 35                                        | Intercept                                         | -5.393 | 3.288 | -11.838 to 1.452 | -1.640 | 0.101  |
|                                           | Peripheral distribution                           | 1.619  | 3.529 | -5.297 to 8.536  | 0.459  | 0.646  |
|                                           | k = 5, $\tau_2$ = 0.617, I2 = 32.942, QM = 0.211  |        |       |                  |        |        |
| 36                                        | Intercept                                         | -4.371 | 1.735 | -7.772 to -1.978 | -2.519 | 0.012  |
|                                           | Bilateral or $\geq 3$ lobe involvement            | 1.857  | 2.445 | -2.935 to 6.657  | 0.759  | 0.448  |
|                                           | k = 12, $\tau_2$ = 1.547, I2 = 84.184, QM = 0.577 |        |       |                  |        |        |

465 † Coefficients represent logit-transformed proportions; positive coefficients suggest increased risk and  
466 negative coefficients suggest decreased risk.

467 ‡ Biochemical parameters have been interpreted as low / high based on reference ranges considered in  
468 each study.

469

470

471

472

473

474

475

476

477

478

479

480

481

482

483

484 **Table S6:** Results of all univariate meta-regression analyses examining the moderator effects of  
 485 the covariates on the case-fatality rate in COVID-19.

| Model                        | Variable                                                        | Coefficient † | SE     | 95%CI             | Z      | p      |
|------------------------------|-----------------------------------------------------------------|---------------|--------|-------------------|--------|--------|
| <b>Demographic variables</b> |                                                                 |               |        |                   |        |        |
| 1                            | Intercept                                                       | -13.847       | 2.681  | -19.101 to -8.593 | -5.165 | <0.001 |
|                              | Age                                                             | 0.198         | 0.052  | 0.096 to 0.299    | 3.838  | <0.001 |
|                              | k = 25, $\tau^2 = 0.506$ , I <sup>2</sup> = 50.639, QM = 14.733 |               |        |                   |        |        |
| 2                            | Intercept                                                       | -3.250        | 0.553  | -4.334 to -2.166  | -5.874 | <0.001 |
|                              | Age ≤ 18 years                                                  | -39.307       | 18.722 | -76.002 to -2.613 | -2.100 | 0.036  |
|                              | k = 20, $\tau^2 = 0.755$ , I <sup>2</sup> = 57.711, QM = 4.408  |               |        |                   |        |        |
| 3                            | Intercept                                                       | -6.156        | 1.012  | -8.140 to -4.172  | -6.081 | <0.001 |
|                              | Age ≥ 60 years                                                  | 7.499         | 2.949  | 1.720 to 13.278   | 2.543  | 0.011  |
|                              | k = 14, $\tau^2 = 0.731$ , I <sup>2</sup> = 44.403, QM = 6.468  |               |        |                   |        |        |
| 4                            | Intercept                                                       | -4.422        | 1.938  | -8.221 to -3.623  | -2.281 | 0.023  |
|                              | Female                                                          | -0.868        | 3.930  | -8.570 to 6.834   | -0.221 | 0.825  |
|                              | k = 25, $\tau^2 = 2.986$ , I <sup>2</sup> = 84.794, QM = 0.049  |               |        |                   |        |        |
| <b>Past medical history</b>  |                                                                 |               |        |                   |        |        |
| 5                            | Intercept                                                       | -3.966        | 0.865  | -5.660 to -2.271  | -4.587 | <0.001 |
|                              | DM-2                                                            | -4.139        | 4.769  | -13.485 to 5.257  | -0.868 | 0.385  |
|                              | k = 19, $\tau^2 = 2.493$ , I <sup>2</sup> = 85.131, QM = 0.754  |               |        |                   |        |        |
| 6                            | Intercept                                                       | -4.843        | 0.937  | -6.680 to -3.396  | -5.167 | <0.001 |
|                              | Hypertension                                                    | 6.070         | 3.098  | -0.002 to 12.143  | 1.959  | 0.050  |
|                              | k = 17, $\tau^2 = 0.818$ , I <sup>2</sup> = 62.909, QM = 3.839  |               |        |                   |        |        |
| 7                            | Intercept                                                       | -5.658        | 1.528  | -8.653 to -2.663  | -3.703 | <0.001 |
|                              | Cardiac disease                                                 | 6.298         | 5.635  | -4.746 to 17.343  | 1.118  | 0.264  |
|                              | k = 16, $\tau^2 = 3.590$ , I <sup>2</sup> = 87.325, QM = 1.249  |               |        |                   |        |        |
| 8                            | Intercept                                                       | -5.096        | 1.329  | -7.701 to -2.491  | -3.833 | <0.001 |
|                              | Chronic liver disease                                           | 2.410         | 21.686 | -40.093 to 44.913 | 0.111  | 0.912  |
|                              | k = 17, $\tau^2 = 3.515$ , I <sup>2</sup> = 84.824, QM = 0.012  |               |        |                   |        |        |
| 9                            | Intercept                                                       | -4.976        | 1.169  | -7.267 to -2.685  | -4.256 | <0.001 |
|                              | Chronic kidney disease                                          | -4.095        | 24.503 | -52.120 to 43.938 | -0.167 | 0.867  |
|                              | k = 17, $\tau^2 = 3.415$ , I <sup>2</sup> = 85.031, QM = 0.028  |               |        |                   |        |        |
| 10                           | Intercept                                                       | -5.202        | 1.169  | -7.492 to -2.912  | -4.452 | <0.001 |
|                              | Malignancy                                                      | 25.193        | 22.794 | -19.482 to 69.869 | 1.105  | 0.269  |
|                              | k = 18, $\tau^2 = 2.874$ , I <sup>2</sup> = 86.440, QM = 1.222  |               |        |                   |        |        |
| 11                           | Intercept                                                       | -4.718        | 1.206  | -7.081 to -2.355  | -3.913 | <0.001 |
|                              | COPD                                                            | 11.975        | 37.673 | -61.863 to 85.813 | 0.318  | 0.751  |
|                              | k = 10, $\tau^2 = 3.332$ , I <sup>2</sup> = 90.202, QM = 0.101  |               |        |                   |        |        |

| <b>Presenting symptoms</b>         |                                                                |          |            |                           |        |        |
|------------------------------------|----------------------------------------------------------------|----------|------------|---------------------------|--------|--------|
| 12                                 | Intercept                                                      | -3.582   | 0.815      | -5.179 to -1.985          | -4.397 | <0.001 |
|                                    | Asymptomatic                                                   | -22.825  | 23.869     | -69.607 to 23.957         | -0.956 | 0.339  |
|                                    | k = 10, $\tau^2 = 0.832$ , I <sup>2</sup> = 53.265, QM = 0.914 |          |            |                           |        |        |
| 13                                 | Intercept                                                      | -16.665  | 6.768      | -29.930 to -3.401         | -2.462 | 0.014  |
|                                    | Fever                                                          | 13.979   | 7.552      | -0.823 to 28.781          | 1.851  | 0.064  |
|                                    | k = 21, $\tau^2 = 2.575$ , I <sup>2</sup> = 81.750, QM = 3.426 |          |            |                           |        |        |
| 14                                 | Intercept                                                      | -4.380   | 1.630      | -7.574 to -1.186          | -2.688 | 0.007  |
|                                    | Cough                                                          | -0.590   | 2.693      | -5.867 to 4.688           | -0.219 | 0.827  |
|                                    | k = 22, $\tau^2 = 2.526$ , I <sup>2</sup> = 79.906, QM = 0.048 |          |            |                           |        |        |
| 15                                 | Intercept                                                      | -4.031   | 1.764      | -7.488 to -9.574          | -2.285 | 0.022  |
|                                    | Sore throat                                                    | -12.722  | 13.745     | -39.662 to 14.219         | -0.926 | 0.355  |
|                                    | k = 14, $\tau^2 = 3.976$ , I <sup>2</sup> = 82.831, QM = 0.857 |          |            |                           |        |        |
| 16                                 | Intercept                                                      | -4.512   | 1.018      | -6.507 to -2.518          | -4.434 | <0.001 |
|                                    | Tachypnea                                                      | 3.019    | 2.240      | -1.371 to 7.419           | 1.348  | 0.178  |
|                                    | k = 6, $\tau^2 = 0.000$ , I <sup>2</sup> = 0.000, QM = 1.816   |          |            |                           |        |        |
| 17                                 | Intercept                                                      | -5.384   | 0.963      | -7.272 to -3.497          | -5.592 | <0.001 |
|                                    | Dyspnea                                                        | 5.208    | 2.959      | -0.592 to 11.528          | 1.760  | 0.078  |
|                                    | k = 17, $\tau^2 = 1.833$ , I <sup>2</sup> = 78.737, QM = 3.097 |          |            |                           |        |        |
| 18                                 | Intercept                                                      | -5.809   | 1.825      | -9.386 to -2.232          | -3.183 | 0.001  |
|                                    | Myalgia                                                        | 3.859    | 5.323      | -6.575 to 14.292          | 0.725  | 0.469  |
|                                    | k = 13, $\tau^2 = 3.173$ , I <sup>2</sup> = 78.683, QM = 0.525 |          |            |                           |        |        |
| 19                                 | Intercept                                                      | -4.991   | 0.697      | -6.357 to -3.625          | -7.162 | <0.001 |
|                                    | Fatigue                                                        | 2.601    | 1.314      | 0.025 to 5.178            | 1.979  | 0.048  |
|                                    | k = 10, $\tau^2 = 0.000$ , I <sup>2</sup> = 0.000, QM = 3.917  |          |            |                           |        |        |
| 20                                 | Intercept                                                      | -3.100   | 0.975      | -5.010 to -1.189          | -3.180 | 0.001  |
|                                    | Headache                                                       | -13.603  | 10.138     | -33.474 to 6.268          | -1.342 | 0.180  |
|                                    | k = 15, $\tau^2 = 2.078$ , I <sup>2</sup> = 83.381, QM = 1.800 |          |            |                           |        |        |
| 21                                 | Intercept                                                      | -5.158   | 1.600      | -8.294 to -2.223          | -3.224 | 0.001  |
|                                    | Diarrhea                                                       | 0.674    | 12.728     | -24.272 to 25.629         | 0.053  | 0.958  |
|                                    | k = 18, $\tau^2 = 4.168$ , I <sup>2</sup> = 87.268, QM = 0.003 |          |            |                           |        |        |
| <b>Laboratory investigations ‡</b> |                                                                |          |            |                           |        |        |
| 22                                 | Intercept                                                      | -277.080 | 203424.495 | -398981.762 to 398427.693 | -0.001 | 0.999  |
|                                    | Nucleic acid test positive                                     | 272.246  | 203424.495 | -398432.438 to 398976.929 | 0.001  | 0.999  |
|                                    | k = 18, $\tau^2 = 2.967$ , I <sup>2</sup> = 85.532, QM = 0.000 |          |            |                           |        |        |
| 23                                 | Intercept                                                      | -5.304   | 2.008      | -9.239 to -1.369          | -2.642 | 0.008  |
|                                    | Leukopenia                                                     | -2.851   | 4.864      | -12.385 to 6.682          | -0.586 | 0.558  |
|                                    | k = 14, $\tau^2 = 7.059$ , I <sup>2</sup> = 89.937, QM = 0.344 |          |            |                           |        |        |
| 24                                 | Intercept                                                      | -7.326   | 1.868      | -10.987 to -3.665         | -3.922 | <0.001 |
|                                    | Leukocytosis                                                   | 20.497   | 7.588      | 5.624 to 35.369           | 2.701  | 0.007  |
|                                    | k = 14, $\tau^2 = 0.790$ , I <sup>2</sup> = 55.410, QM = 7.296 |          |            |                           |        |        |



|                                           |                                                                 |           |          |                       |        |        |
|-------------------------------------------|-----------------------------------------------------------------|-----------|----------|-----------------------|--------|--------|
| 25                                        | Intercept                                                       | -5.628    | 2.680    | -10.880 to -3.375     | -2.100 | 0.036  |
|                                           | Thrombocytopenia                                                | -2.645    | 12.249   | -26.652 to 21.362     | -0.216 | 0.829  |
|                                           | k = 8, $\tau^2 = 7.292$ , I <sup>2</sup> = 89.313, QM = 0.047   |           |          |                       |        |        |
| 26                                        | Intercept                                                       | -10.089   | 4.017    | -17.961 to -2.216     | -2.512 | 0.012  |
|                                           | Lymphopenia                                                     | 8.553     | 6.098    | -3.398 to 24.574      | 1.403  | 0.161  |
|                                           | k = 15, $\tau^2 = 6.297$ , I <sup>2</sup> = 87.338, QM = 1.967  |           |          |                       |        |        |
| 27                                        | Intercept                                                       | -9.907    | 3.336    | -16.444 to -3.369     | -2.970 | 0.003  |
|                                           | High LDH                                                        | 8.923     | 4.123    | 0.842 to 17.604       | 2.164  | 0.030  |
|                                           | k = 9, $\tau^2 = 0.938$ , I <sup>2</sup> = 46.607, QM = 4.684   |           |          |                       |        |        |
| 28                                        | Intercept                                                       | -6.740    | 1.325    | -9.336 to -4.143      | -5.088 | <0.001 |
|                                           | Low Albumin                                                     | 4.782     | 1.433    | 1.973 to 7.591        | 3.337  | <0.001 |
|                                           | k = 6, $\tau^2 = 0.000$ , I <sup>2</sup> = 0.000, QM = 11.136   |           |          |                       |        |        |
| 29                                        | Intercept                                                       | -22.970   | 10.385   | -43.324 to -2.616     | -2.212 | 0.027  |
|                                           | High CRP                                                        | 23.196    | 11.885   | -0.097 to 46.499      | 1.952  | 0.051  |
|                                           | k = 15, $\tau^2 = 1.120$ , I <sup>2</sup> = 63.919, QM = 3.809  |           |          |                       |        |        |
| 30                                        | Intercept                                                       | -6.882    | 4.270    | -15.250 to 1.486      | -1.612 | 0.107  |
|                                           | High procalcitonin                                              | -12.881   | 22.821   | -57.609 to 31.847     | -0.564 | 0.572  |
|                                           | k = 10, $\tau^2 = 11.734$ , I <sup>2</sup> = 89.835, QM = 0.319 |           |          |                       |        |        |
| <b>Radiological features on CT thorax</b> |                                                                 |           |          |                       |        |        |
| 32                                        | Intercept                                                       | -2.321    | 0.316    | -2.939 to -1.791      | -7.344 | <0.001 |
|                                           | No lesions on CT                                                | -1941.342 | 3948.493 | -9680.245 to 5797.561 | -0.492 | 0.623  |
|                                           | k = 13, $\tau^2 = 0.000$ , I <sup>2</sup> = 0.000, QM = 0.242   |           |          |                       |        |        |
| 33                                        | Intercept                                                       | -4.454    | 2.631    | -9.609 to 2.702       | -1.693 | 0.090  |
|                                           | Patchy consolidations                                           | -1.290    | 5.246    | -11.572 to 8.992      | -0.246 | 0.806  |
|                                           | k = 9, $\tau^2 = 2.859$ , I <sup>2</sup> = 72.114, QM = 0.060   |           |          |                       |        |        |
| 34                                        | Intercept                                                       | -1.341    | 1.554    | -4.387 to 1.746       | -0.863 | 0.388  |
|                                           | Ground glass opacities                                          | -8.374    | 5.039    | -18.250 to 1.552      | -1.662 | 0.097  |
|                                           | k = 13, $\tau^2 = 2.225$ , I <sup>2</sup> = 77.488, QM = 2.762  |           |          |                       |        |        |
| 35                                        | Intercept                                                       | -9.953    | 4.723    | -19.210 to -2.695     | -2.107 | 0.035  |
|                                           | Bilateral or $\geq 3$ lobe involvement                          | 7.011     | 6.069    | -4.883 to 18.956      | 1.155  | 0.248  |
|                                           | k = 12, $\tau^2 = 3.840$ , I <sup>2</sup> = 86.622, QM = 1.335  |           |          |                       |        |        |

486

487 † Coefficients represent logit-transformed proportions; positive coefficients suggest increased risk and  
 488 negative coefficients suggest decreased risk.

489 ‡ Biochemical parameters have been interpreted as low / high based on reference ranges considered in  
 490 each study.

491 **References of Appendix**

- 492 1 Cai J, Xu J, Lin D, Yang Z, Xu L, Qu Z, *et al.* A Case Series of children with 2019 novel  
493 coronavirus infection: clinical and epidemiological features. *Clin Infect Dis.* 2020.
- 494 2 Chen C, Yan JT, Zhou N, Zhao JP, Wang DW. [Analysis of myocardial injury in patients  
495 with COVID-19 and association between concomitant cardiovascular diseases and severity of  
496 COVID-19]. *Zhonghua Xin Xue Guan Bing Za Zhi.* 2020; 48: E008.
- 497 3 Chen H, Guo J, Wang C, Luo F, Yu X, Zhang W, *et al.* Clinical characteristics and  
498 intrauterine vertical transmission potential of COVID-19 infection in nine pregnant women: a  
499 retrospective review of medical records. *Lancet.* 2020; 395: 809-15.
- 500 4 Chen L, Liu HG, Liu W, Liu J, Liu K, Shang J, *et al.* [Analysis of clinical features of 29  
501 patients with 2019 novel coronavirus pneumonia]. *Zhonghua Jie He He Hu Xi Za Zhi.* 2020; 43:  
502 E005.
- 503 5 Chen N, Zhou M, Dong X, Qu J, Gong F, Han Y, *et al.* Epidemiological and clinical  
504 characteristics of 99 cases of 2019 novel coronavirus pneumonia in Wuhan, China: a descriptive  
505 study. *Lancet.* 2020; 395: 507-13.
- 506 6 Chen W, Lan Y, Yuan X, Deng X, Li Y, Cai X, *et al.* Detectable 2019-nCoV viral RNA  
507 in blood is a strong indicator for the further clinical severity. *Emerg Microbes Infect.* 2020; 9:  
508 469-73.
- 509 7 Li K, Wu J, Wu F, Guo D, Chen L, Fang Z, *et al.* The Clinical and Chest CT Features  
510 Associated with Severe and Critical COVID-19 Pneumonia. *Invest Radiol.* 2020.
- 511 8 Li YY, Wang WN, Lei Y, Zhang B, Yang J, Hu JW, *et al.* [Comparison of the clinical  
512 characteristics between RNA positive and negative patients clinically diagnosed with 2019 novel  
513 coronavirus pneumonia]. *Zhonghua Jie He He Hu Xi Za Zhi.* 2020; 43: E023.

- 514 9 Liu C, Jiang ZC, Shao CX, Zhang HG, Yue HM, Chen ZH, *et al.* [Preliminary study of  
515 the relationship between novel coronavirus pneumonia and liver function damage: a multicenter  
516 study]. *Zhonghua Gan Zang Bing Za Zhi.* 2020; 28: 148-52.
- 517 10 Liu K, Fang YY, Deng Y, Liu W, Wang MF, Ma JP, *et al.* Clinical characteristics of  
518 novel coronavirus cases in tertiary hospitals in Hubei Province. *Chin Med J (Engl).* 2020.
- 519 11 Liu W, Tao ZW, Lei W, Ming-Li Y, Kui L, Ling Z, *et al.* Analysis of factors associated  
520 with disease outcomes in hospitalized patients with 2019 novel coronavirus disease. *Chin Med J*  
521 *(Engl).* 2020.
- 522 12 Liu Y, Yang Y, Zhang C, Huang F, Wang F, Yuan J, *et al.* Clinical and biochemical  
523 indexes from 2019-nCoV infected patients linked to viral loads and lung injury. *Sci China Life*  
524 *Sci.* 2020; 63: 364-74.
- 525 13 Tian S, Hu N, Lou J, Chen K, Kang X, Xiang Z, *et al.* Characteristics of COVID-19  
526 infection in Beijing. *J Infect.* 2020.
- 527 14 Wang D, Ju XL, Xie F, Lu Y, Li FY, Huang HH, *et al.* [Clinical analysis of 31 cases of  
528 2019 novel coronavirus infection in children from six provinces (autonomous region) of northern  
529 China]. *Zhonghua Er Ke Za Zhi.* 2020; 58: E011.
- 530 15 Wang D, Hu B, Hu C, Zhu F, Liu X, Zhang J, *et al.* Clinical Characteristics of 138  
531 Hospitalized Patients With 2019 Novel Coronavirus-Infected Pneumonia in Wuhan, China.  
532 *JAMA.* 2020.
- 533 16 Wang L, Gao YH, Lou LL, Zhang GJ. The clinical dynamics of 18 cases of COVID-19  
534 outside of Wuhan, China. *Eur Respir J.* 2020.
- 535 17 Wu J, Liu J, Zhao X, Liu C, Wang W, Wang D, *et al.* Clinical Characteristics of Imported  
536 Cases of COVID-19 in Jiangsu Province: A Multicenter Descriptive Study. *Clin Infect Dis.* 2020.

- 537 18 Wu WS, Li YG, Wei ZF, Zhou PH, Lyu LK, Zhang GP, *et al.* [Investigation and analysis  
538 on characteristics of a cluster of COVID-19 associated with exposure in a department store in  
539 Tianjin]. *Zhonghua Liu Xing Bing Xue Za Zhi.* 2020; 41: 489-93.
- 540 19 Xia W, Shao J, Guo Y, Peng X, Li Z, Hu D. Clinical and CT features in pediatric patients  
541 with COVID-19 infection: Different points from adults. *Pediatr Pulmonol.* 2020.
- 542 20 Xu XW, Wu XX, Jiang XG, Xu KJ, Ying LJ, Ma CL, *et al.* Clinical findings in a group  
543 of patients infected with the 2019 novel coronavirus (SARS-Cov-2) outside of Wuhan, China:  
544 retrospective case series. *BMJ.* 2020; 368: m606.
- 545 21 Xu YH, Dong JH, An WM, Lv XY, Yin XP, Zhang JZ, *et al.* Clinical and computed  
546 tomographic imaging features of novel coronavirus pneumonia caused by SARS-CoV-2. *J Infect.*  
547 2020.
- 548 22 Yang X, Yu Y, Xu J, Shu H, Xia J, Liu H, *et al.* Clinical course and outcomes of  
549 critically ill patients with SARS-CoV-2 pneumonia in Wuhan, China: a single-centered,  
550 retrospective, observational study. *Lancet Respir Med.* 2020.
- 551 23 Yao Y, Tian Y, Zhou J, Ma X, Yang M, Wang S. Epidemiological characteristics of  
552 2019-nCoV infections in Shaanxi, China by February 8, 2020. *Eur Respir J.* 2020.
- 553 24 Young BE, Ong SWX, Kalimuddin S, Low JG, Tan SY, Loh J, *et al.* Epidemiologic  
554 Features and Clinical Course of Patients Infected With SARS-CoV-2 in Singapore. *JAMA.* 2020.
- 555 25 Zhang JJ, Dong X, Cao YY, Yuan YD, Yang YB, Yan YQ, *et al.* Clinical characteristics  
556 of 140 patients infected with SARS-CoV-2 in Wuhan, China. *Allergy.* 2020.
- 557 26 Zhang MQ, Wang XH, Chen YL, Zhao KL, Cai YQ, An CL, *et al.* [Clinical features of  
558 2019 novel coronavirus pneumonia in the early stage from a fever clinic in Beijing]. *Zhonghua*  
559 *Jie He He Hu Xi Za Zhi.* 2020; 43: E013.

45

560 27 Zhao W, Zhong Z, Xie X, Yu Q, Liu J. Relation Between Chest CT Findings and Clinical  
561 Conditions of Coronavirus Disease (COVID-19) Pneumonia: A Multicenter Study. *AJR Am J*  
562 *Roentgenol.* 2020: 1-6.

563 28 Zhu ZW, Tang JJ, Chai XP, Fang ZF, Liu QM, Hu XQ, *et al.* [Comparison of heart  
564 failure and 2019 novel coronavirus pneumonia in chest CT features and clinical characteristics].  
565 *Zhonghua Xin Xue Guan Bing Za Zhi.* 2020; 48: E007.

566

567
